1 **Full Title**

2 Forward genetics in *Wolbachia*: Regulation of *Wolbachia* proliferation by the  
3 amplification and deletion of an addictive genomic island

4

5 **Authors**

6 Elves H Duarte<sup>1,2,3\*</sup>, Ana Carvalho<sup>1,4</sup>, Sergio López-Madrugal<sup>1</sup>, João Costa<sup>1</sup>, Luís  
7 Teixeira<sup>1,5\*</sup>

8 (1) Instituto Gulbenkian de Ciência, Oeiras, Portugal.

9 (2) Faculdade de Ciências e Tecnologia, Universidade de Cabo Verde, Palmarejo, Cabo  
10 Verde.

11 (3) Current address: Department of Genetics, University of Cambridge, Cambridge, United  
12 Kingdom.

13 (4) Current address: Department of Evolutionary Ecology, Institute of Organismic and  
14 Molecular Evolution, Johannes Gutenberg University, Mainz, Germany

15 (5) Faculdade de Medicina, Universidade de Lisboa, Lisboa, Portugal.

16

17 **\* corresponding authors:**

18 Elves H Duarte: ehelegam@gmail.com

19 Luís Teixeira: lteixeira@igc.gulbenkian.pt

20

21 **Abstract**

22 *Wolbachia* is one of the most prevalent bacterial endosymbionts, infecting approximately  
23 40% of terrestrial arthropod species. *Wolbachia* is often a reproductive parasite but can  
24 also provide fitness benefits to its host, as, for example, protection against viral pathogens.  
25 This protective effect is currently being applied to fight arboviruses transmission by  
26 releasing *Wolbachia*-transinfected mosquitoes. Titre regulation is a crucial aspect of  
27 *Wolbachia* biology. Higher titres can lead to stronger phenotypes and fidelity of  
28 transmission but can have a higher cost to the host. Since *Wolbachia* is maternally  
29 transmitted, its fitness depends on host fitness, and, therefore, its cost to the host may be  
30 under selection. Understanding how *Wolbachia* titres are regulated and other aspects of

31 *Wolbachia* biology has been hampered by the lack of genetic tools. Here we developed a  
32 forward genetic screen to identify new *Wolbachia* over-proliferative mutant variants. We  
33 characterized in detail two new mutants, *wMelPop2* and *wMelOctoless*, and show that the  
34 amplification or loss of the Octomom genomic region lead to over-proliferation. These  
35 results confirm previous data and expand on the complex role of this genomic region in the  
36 control of *Wolbachia* proliferation. Both new mutants shorten the host lifespan and  
37 increase antiviral protection. Moreover, we show that *Wolbachia* proliferation rate in  
38 *Drosophila melanogaster* depends on the interaction between Octomom copy number, the  
39 host developmental stage, and temperature. Our analysis also suggests that the life  
40 shortening and antiviral protection phenotypes of *Wolbachia* are dependent on different,  
41 but related, properties of the endosymbiont; the rate of proliferation and the titres near the  
42 time of infection, respectively. Altogether, we demonstrate the feasibility of a novel and  
43 unbiased experimental approach to study *Wolbachia* biology, which can be further adapted  
44 to characterize other genetically intractable bacterial endosymbionts.

45

## 46 **Introduction**

47 Intracellular maternally-transmitted bacterial symbionts (bacterial endosymbionts) are  
48 widespread in insects [1]. These bacterial endosymbionts can be mutualistic by, for  
49 instance, complementing the diets of their hosts, and may expand the range of ecological  
50 niches of their insect hosts [1]. They can also be parasitic, often manipulating the  
51 reproduction of their hosts and promoting their spread in the host population [1].  
52 Understanding the interaction of endosymbionts with their hosts is crucial to understand  
53 much of insect biology. A key aspect of this interaction is the regulation of endosymbiont  
54 titres, which influence the strength of the induced phenotypes and the cost to the hosts  
55 [2,3].

56 *Wolbachia* is one of the most prevalent bacterial endosymbionts in arthropods, being found  
57 in approximately 40% of terrestrial arthropod species [4]. *Wolbachia* is broadly known as a  
58 host reproduction manipulator [5]. However it can also be mutualistic, by, for example,  
59 vitamin provision [6] or protection against viral pathogens [7,8].

60 The discovery of *Wolbachia*-induced protection against viruses in *Drosophila*  
61 *melanogaster*, prompted its use to control arboviruses transmission by insect vectors [9].  
62 *Aedes aegypti* mosquitoes trans-infected with *Wolbachia* have increased resistance to  
63 viruses, including dengue, chikungunya, Zika, and yellow fever viruses, and, therefore,  
64 reduced vector competence [10–13]. Release of *Wolbachia*-infected mosquitoes in

65 dengue-endemic areas is likely to reduce dengue burden [14,15]. Despite the preliminary  
66 successful results of this strategy, we still lack knowledge on several fundamental aspects  
67 of *Wolbachia* biology and interaction with viral pathogens, which hinders predicting the  
68 long-term outcome of *Wolbachia*-based interventions to control insect-vector transmitted  
69 viruses.

70 *Wolbachia* titres are a critical factor regulating its biology and interaction with the host [3].  
71 Titres correlate positively with transmission fidelity and the strength of *Wolbachia*-induced  
72 phenotypes, including the *Wolbachia* pathogen blocking phenotype [3,16–20]. In contrast,  
73 higher titres are associated with a reduction in host lifespan [16,17,21,22]. This may also  
74 have a cost to *Wolbachia*, since as a vertically transmitted bacterium, its fitness depends  
75 on the host fitness. Thus, *Wolbachia* titres regulation by the symbiont or the host may be  
76 under selection. Although several host and environmental factors (e.g. temperature) have  
77 been shown to affect *Wolbachia* titres, less is known about *Wolbachia* genes that regulate  
78 its titres [3].

79 So far, a single *Wolbachia* genetic factor, the Octomom region, has been shown to  
80 influence proliferation [16,17]. This genomic region, predicted to encode eight genes, is  
81 amplified in the highly proliferative and pathogenic wMelPop. Moreover, the degree of  
82 amplification of the Octomom region determines the proliferation rate of wMelPop and the  
83 strength of its life shortening phenotype [17].

84 The genetic intractability of *Wolbachia*, which remains unculturable so far, hampers the  
85 identification of more genetic modifications altering *Wolbachia* proliferation. Hence,  
86 unbiased approaches such as genetic screens could contribute to our understanding of the  
87 genetic bases of *Wolbachia*-host interactions. Here, we developed a screening strategy in  
88 *Wolbachia* to isolate novel over-proliferating variants. The strategy was based on random  
89 mutagenesis, which has been applied before to other unculturable bacteria [23]. We fed  
90 the mutagen ethyl methanesulfonate (EMS) to *D. melanogaster* females carrying  
91 *Wolbachia* and screened for over-proliferative *Wolbachia* in their progeny. This approach  
92 allowed us to isolate new mutant over-proliferating *Wolbachia* variants. We identified the  
93 causative genetic changes in *Wolbachia* causing over-proliferation and made a detailed  
94 phenotypical characterization in terms of proliferation, cost to the host, and antiviral  
95 protection. We identified a new mutation leading to *Wolbachia* over-proliferation and  
96 revealed a complex role for the Octomom region in regulating *Wolbachia* proliferation.  
97 Moreover, we demonstrated the feasibility of a novel and unbiased experimental approach  
98 to study *Wolbachia* biology.

## 100 **Results**

### 101 **Isolation of over-proliferative *Wolbachia* in an unbiased forward genetic screen**

102 We implemented a classical forward genetic screen in order to isolate new over-  
103 proliferative *Wolbachia* variants. We attempted to mutagenize *Wolbachia* by feeding the  
104 mutagen EMS to *Wolbachia*-carrying *D. melanogaster* females. EMS is extensively used in  
105 *D. melanogaster* [24] and has been previously used to mutagenize intracellular bacteria in  
106 cell culture [23]. We then tested *Wolbachia* titres, by real-time quantitative PCR (qPCR), in  
107 the progeny of treated females, since this bacterium is maternally transmitted. We used  
108 flies with the variant *wMelCS\_b* as our starting variant because of its potential to easily  
109 become over-proliferative, given its genetic proximity to the over-proliferative and  
110 pathogenic *wMelPop* variant [16,17,22,25].

111 Putative mutagenized *Wolbachia* cells within the host would be in a mixed population,  
112 which would make it harder to assess their specific phenotype. However, we hypothesized  
113 that over-proliferating *Wolbachia* cells could overtake the population and that the resulting  
114 higher titres could be detectable. Moreover, we decided to pre-treat some of the EMS  
115 exposed females with tetracycline to reduce the *Wolbachia* population in these females  
116 and their progeny. This *Wolbachia* titre reduction should decrease competition for any new  
117 mutated *Wolbachia*, increase drift during vertical transmission, and, therefore, potentially  
118 facilitate fixation of new variants. To set up the conditions for tetracycline treatment, we  
119 tested different doses of this antibiotic on females, without EMS. The progeny of treated  
120 females had from 0 to 90% of the *Wolbachia* titres in controls (S1 Fig,  $p < 0.001$  for all  
121 doses compared with control, at generation 1). We then followed the subsequent progeny  
122 of these flies to test how many fly generations it takes to recover normal *Wolbachia* titres.  
123 Except for higher tetracycline doses which lead to infection loss, *Wolbachia* titres  
124 recovered to normal within four fly generations (S1 Fig; linear mixed model [lmm],  $p > 0.48$   
125 for all doses compared with control at generation 4).

126 We also tested for the effect of different EMS doses on the fecundity of *D. melanogaster*  
127 females and *Wolbachia* titres. We observed that increasing doses of EMS reduce female  
128 fecundity (S2A-B Fig, linear model [lm],  $p < 0.001$  for both egg number and adult progeny  
129 per female). Moreover, we found that EMS feeding strongly reduces *Wolbachia* titres in the  
130 next generation, in a dose-dependent manner (S2C-D Fig, non-linear model [nls] fit,  $p <$   
131 0.001). Titres were reduced by up to 90% when 8,000 mM EMS was supplied, leading to  
132 the loss of *Wolbachia* in the next generation in some lines (S2C-D Fig). Given these

133 results and the recovery time after tetracycline treatment detailed above, we quantified  
134 *Wolbachia* titres at the first generation (F1), the immediate progeny of EMS-treated  
135 females, and at the fourth generation after treatment (F4), when we would expect  
136 *Wolbachia* titres to recover after the severe reduction due to EMS treatment.

137 We screened approximately one thousand F1 progeny of EMS-treated females, in a range  
138 of experimental conditions, and at least one F4 female descendent per treated female. We  
139 varied EMS dose from 10 mM to 8,000 mM, and tetracycline dose from 0 µg/ml to 12.5  
140 µg/ml, in different combinations (S1 Table). The relative *Wolbachia* titre was determined  
141 when females were ten days old, after they laid eggs, so that any putatively interesting  
142 progeny could be followed up.

143 In three independent batches of EMS-treated flies, we detected females with 3 to 14-fold  
144 more *Wolbachia* than controls, suggesting the presence of over-proliferative variants (Fig 1  
145 and S3 Fig). In two batches, over-proliferating *Wolbachia* were identified in the F1 and in  
146 the other batch in the F4. We assessed *Wolbachia* titres in the next generation and found  
147 that the over-proliferative phenotypes were inherited. Subsequent selection allowed us to  
148 establish *D. melanogaster* lines carrying new potentially over-proliferative *Wolbachia*  
149 variants.

150

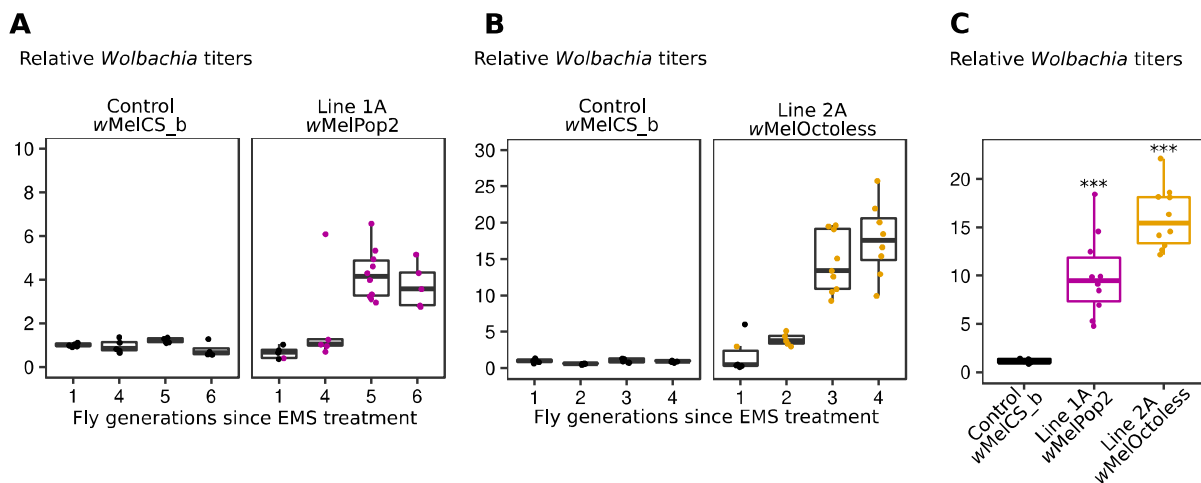

151

152 **Fig 1. Isolation of over-proliferative *Wolbachia* variants by a forward genetic screen.**

153 (A and B) Relative *Wolbachia* titres in a control (wMelCS\_b) and EMS-treated flies (Lines 1A and 2A). 5–10  
154 virgin females were randomly collected each generation for egg-laying and *Wolbachia* titre measurement  
155 using qPCR. Bacterial titres are normalized to that of control flies. The female used in the first generation  
156 to start the next generation is coloured. At the other generations the progeny of the female with the higher  
157 *Wolbachia* titre was used to set up the next generation. The selection of the other putative over-proliferating  
158 *Wolbachia* line in panel B is shown in S3A Fig. (C) Relative titres of over-proliferating *Wolbachia* variants in a  
159 host isogenic genetic background. Both lines kept the over-proliferative phenotype ( $p < 0.001$ ). Each dot  
160 represents the *Wolbachia* titre of a single female.

161

162 We designed the screen to find new mutants of *Wolbachia* that lead to the endosymbiont  
163 over-proliferation. However, EMS will most likely also induce mutations in the host, in the  
164 nuclear or mitochondrial genomes, that can be transmitted. To minimize the influence of  
165 host nuclear mutations on our screen, we backcrossed the EMS-treated females and their  
166 progeny, at every generation, with males from the control isogenic line. To verify that new  
167 mutations in the host were not the cause of *Wolbachia* over-proliferation, we replaced the  
168 first, second and third chromosomes of *D. melanogaster* females carrying the over-  
169 proliferating *Wolbachia* variants in lines 1A, 2A, and 3A, with the chromosomes of the  
170 control line, through the use of balancer chromosomes (S4 Fig). We then repeated  
171 *Wolbachia* titres quantification and found that the over-proliferative phenotypes were  
172 maintained (Fig 1C, S5 Fig; Imm, p-value < 0.001 for all compared with wMelCS\_b).

173 Since mitochondria are maternally transmitted and could have been also mutated by EMS,  
174 the experiments described above cannot exclude the possibility that *Wolbachia* over-  
175 proliferation is mitochondria-determined. Thus, the mitogenome of the lines 1A and 2A,  
176 showing higher *Wolbachia* titres, were sequenced with Illumina short-reads and aligned to  
177 the mitochondrial reference genome release 6 (GenBank: KJ947872.2:1–14,000, S2  
178 Table). We did not find SNPs or indels unique to the mitochondria of these flies, which  
179 shows that flies with over-proliferative *Wolbachia* did not inherit mutated mitochondria (S3  
180 Table). Therefore, we concluded that the observed *Wolbachia* over-proliferative  
181 phenotypes did not result from mutations in neither the nuclear or mitochondrial host  
182 genome.

183

#### 184 **Identification of genetic basis of the new over-proliferative variants**

185 To identify the mutations associated with over-proliferation, we sequenced and assembled  
186 the genomes of these over-proliferative *Wolbachia*. We performed a hybrid assembly with  
187 short (Illumina) and long-reads (Nanopore) and obtained single and circular genomes for  
188 each *Wolbachia* chromosome (S2 and S4 Tables).

189 To test our assembly pipeline we sequenced and assembled a previously characterized  
190 Cluster III wMel *Wolbachia* variant, named wMel [16], which derives from the line used for  
191 the original wMel reference genome (GenBank: AE017196.1) [26]. The new wMel genome  
192 (GenBank: CP046925.1) was also circular and comparable in size, structure and number  
193 of ORFs with previously published wMel genomes [26,27], including the wMel reference  
194 genome (S4 Table). We found, however, two SNPs and seven indels relative to the wMel

195 reference genome, which we confirmed using Sanger sequencing (S5 Table). These  
196 results validate our sequencing pipeline.

197 We assembled the genome of the control variant *wMelCS\_b* using this pipeline (GenBank:  
198 CP046924.1), in order to be able to identify new mutations in the new variants. We also  
199 compared this new assembly of *wMelCS\_b* with the *wMel* reference genome (GenBank:  
200 AE017196.1) and identified 37 indels and 146 SNPs between these variants (S6 Table).

201 The only difference between the genome of the over-proliferative *Wolbachia* variant in Line  
202 1A (GenBank: CP046922.1) and *wMelCS\_b* was an amplification of the Octomom region  
203 (Fig 2A and S1 Text). There were three more copies of this region, giving a genome size  
204 difference of 62,814bp. The Octomom region amplification, and lack of other differences,  
205 was also confirmed by mapping of the Illumina sequencing reads from Line 1A on the  
206 genome of *wMelCS\_b* (GenBank: CP046924.1) and by qPCR (Fig 2B and S6 Fig). These  
207 results show that Octomom amplification is the cause of over-proliferation, consistently  
208 with previous findings with the variant *wMelPop* [16,17,28]. As shown before for *wMelPop*  
209 [17], we observed variation in the Octomom copy number in *wMelPop2*-carrying flies. For  
210 further analyses of the phenotype of this variant we established, through selection (as in  
211 [17]), *D. melanogaster* lines carrying *Wolbachia* with low (2-3) or high Octomom (8-9) copy  
212 number (S7 Fig). We named this variant *wMelPop2*, given the nature of the genomic  
213 change inducing its over-proliferation.

## A

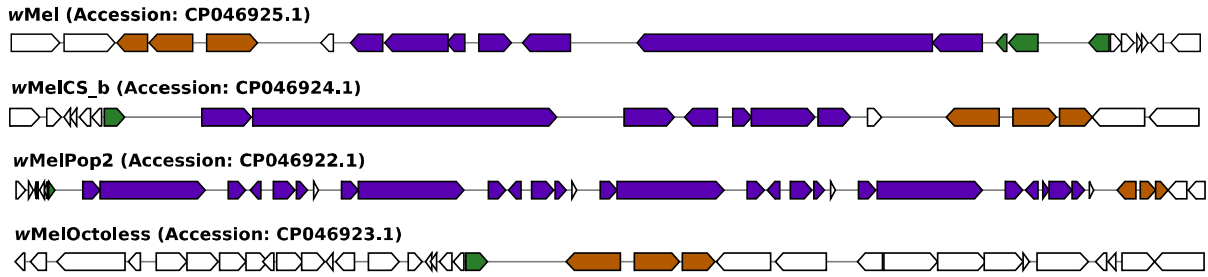

## B

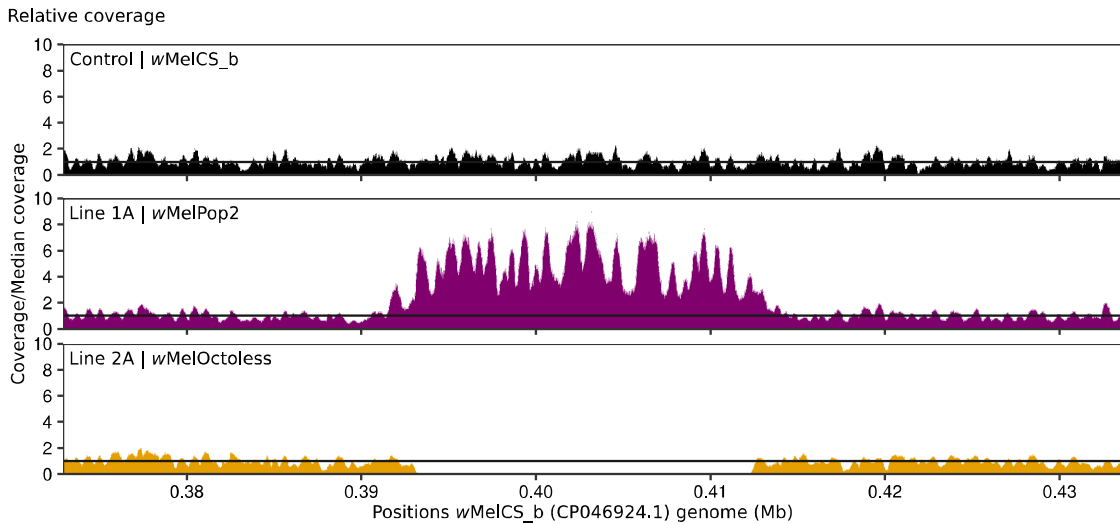

214

215

216 **Fig 2. Both amplification and deletion of Octomom lead to *Wolbachia* over-proliferation.**

217 (A) Representation of Octomom region and its flanking region in over-proliferative *Wolbachia*. *De novo*  
218 assembled genomes of wMel, wMelCS\_b, Line1A (wMelPop2) and Line 2A (wMelOctoless) were annotated  
219 using the NCBI Prokaryotic Genome Annotation Pipeline v4.10. These representations were generated using  
220 MultiGeneBlast v1.1.13 (<http://multigeneblast.sourceforge.net/>) and identify the homologous genes  
221 immediately upstream of Octomom (orange), in the Octomom region (purple), and immediately downstream  
222 of Octomom (green), in the wMel reference genome (GenBank: AE017196.1). Regions are not to scale. Note  
223 that the genome annotation differs between this new wMel genome assembly and the reference genome,  
224 although there is no difference between the sequences in this region. (B) Relative coverage in the genomic  
225 region containing the Octomom region. Illumina paired-end reads of the different *Wolbachia* variants were  
226 mapped to wMelCS\_b genome (GenBank: CP046924.1).

227

228 We sequenced and assembled the wMelPop genome following the same pipeline  
229 (GenBank: CP046921.1) and compared it to wMelPop2. We only detected the two SNPs  
230 previously identified between wMelCS\_b and wMelPop (position 920,191: T in wMelPop  
231 and C in wMelPop2; and position 1,005,339: A in wMelPop and G in wMelPop2 [16]). We  
232 also compared the mitogenome of flies carrying wMelPop and wMelPop2 and found one  
233 single substitution (position 10,793: G in wMelPop and A in wMelPop2) (S3 Table), which  
234 we confirmed using Sanger sequencing. Genome assembly and individual Nanopore long-



235 reads from *wMelPop* and *wMelPop2* (S7 Table, S8 Fig) show that Octomom amplification  
236 in these variants occurs in tandem, as previous data indicated [17].

237 Interestingly, the genome of the over-proliferative *Wolbachia* variant in line 2A (GenBank:  
238 CP046923.1) only differs from *wMelCS\_b* by a deletion of a 20,938bp genomic fragment  
239 that includes the full-length Octomom region and one of its flanking direct repeats (Fig 2A  
240 and S1 Text). Mapping the Illumina sequencing reads of this variant on the genome of  
241 *wMelCS\_b* (GenBank: CP046924.1) confirmed this deletion as the only difference  
242 between the two (Fig 2B). The absence of all Octomom genes in this line was also  
243 confirmed by qPCR (S6 Fig). These results identify loss of the Octomom region as the  
244 cause of this variant over-proliferative phenotype. Thus, we named this variant  
245 *wMelOctoless*.

246 The variant in line 2B, isolated together with *wMelOctoless*, also lost the Octomom region.  
247 This was the only observed difference when mapping the Illumina reads on *wMelCS\_b* (S9  
248 Fig), and no differences were observed when the Illumina reads were mapped to the  
249 *wMelOctoless* genome (GenBank: CP046923.1). Since *wMelOctoless* and the variant in  
250 line 2B were identified in the same batch of mutagenesis, they may be not independent.  
251 However, and importantly, we obtained the same results with another independent over-  
252 proliferative line, isolated in a different batch of treatment, line 3A (S3 and S9 Fig).  
253 Mapping the Illumina sequence reads from this line to *wMelCS\_b* also identifies the loss of  
254 Octomom as the only mutation in this variant. Accordingly, there are no differences to  
255 *wMelOctoless*. Therefore, we named this line *wMelOctoless2*. These results further  
256 confirm that loss of the Octomom region leads to an over-proliferative phenotype in  
257 *Wolbachia*.

258 In summary, we were able to identify the genomic changes associated with the new over-  
259 proliferative variants and all map to loss or amplification of the Octomom region.

260

## 261 **Deletion and amplification of the Octomom region differently impact titres and** 262 **growth of *Wolbachia***

263 In order to characterize better the phenotypes of the new *Wolbachia* variants  
264 *wMelOctoless* and *wMelPop2*, we analysed their proliferation, together with *wMelCS\_b*  
265 and *wMelPop*, in adult males kept at 18°C, 25°C, and 29°C (Fig 3 and S10 Fig). The flies  
266 were reared at 25°C and placed at the different temperatures when 0-1 days old adults. At  
267 this initial point, at adult eclosion, there are differences in titres between lines carrying

268 different *Wolbachia* variants (S11 Fig,  $p < 0.028$  for all comparisons). Flies carrying  
269 *wMelCS\_b* have the lowest relative titre of *Wolbachia*. Flies carrying variants with low  
270 amplification of the Octomom region have approximately twice the titres of *Wolbachia*,  
271 while flies carrying variants with high copy number of this region have three times more  
272 *Wolbachia* than *wMelCS\_b*. Finally, flies carrying *wMelOctoless* have the highest titres,  
273 approximately four-fold higher than flies carrying *wMelCS\_b*. Therefore, the deletion or  
274 amplification of the Octomom region impact *Wolbachia* titres at adult eclosion.

275

### A

Relative *Wolbachia* titer at 18°C

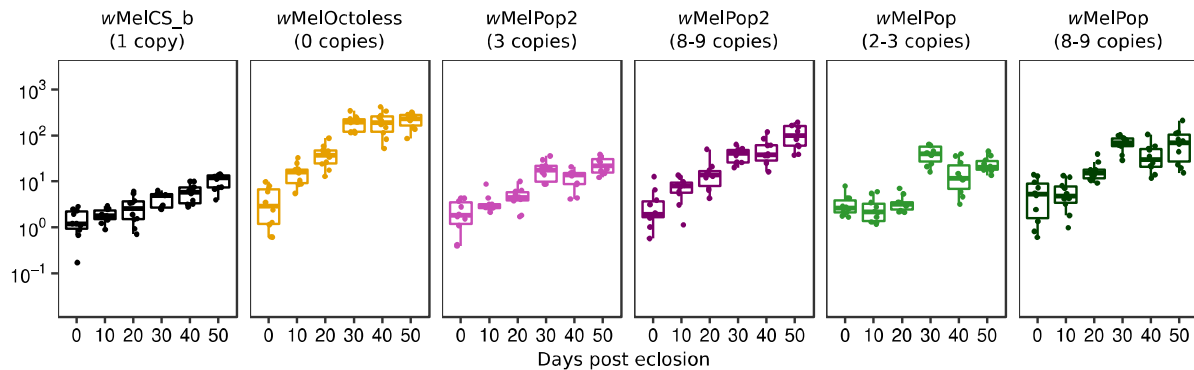

### B

Relative *Wolbachia* titer at 25°C

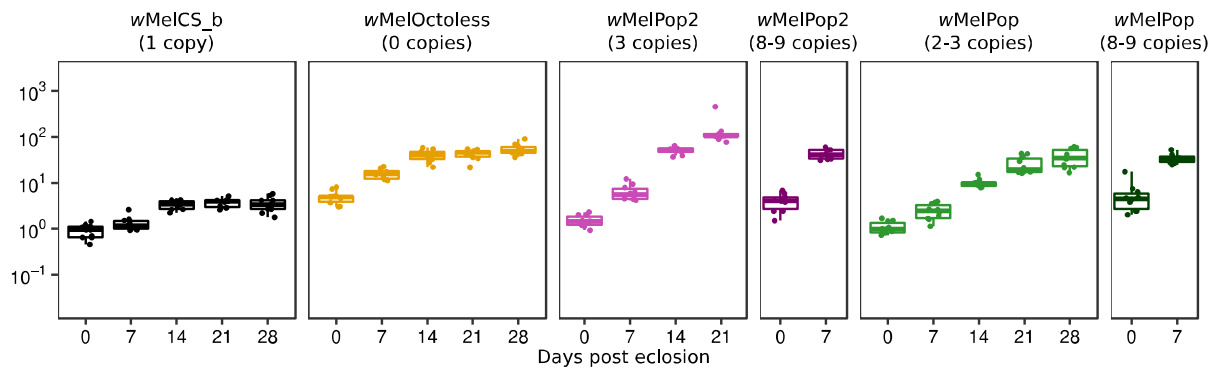

### C

Relative *Wolbachia* titer at 29°C

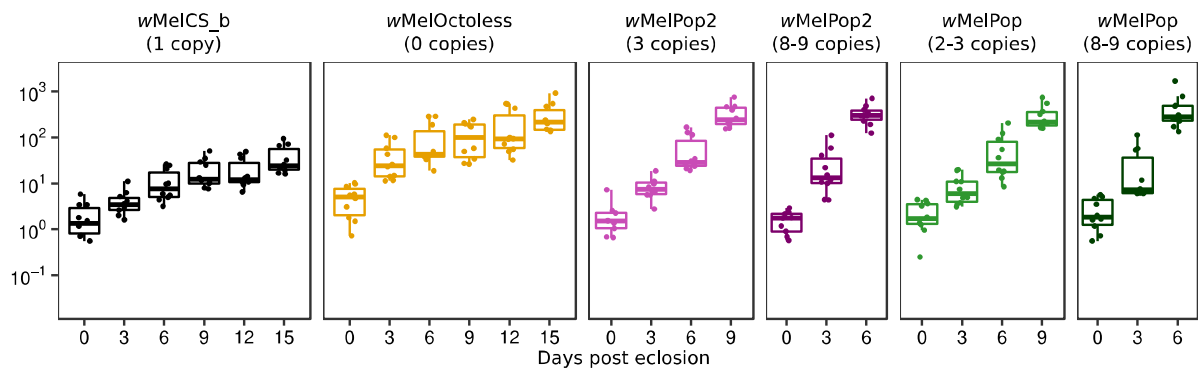

276

277 **Fig 3. The amplification or deletion of Octomom increase *Wolbachia* proliferation rate in adults.**  
 278 Time-course of relative *Wolbachia* titres in adults at 18°C (A), 25°C (B) and 29°C (C) with different *Wolbachia*  
 279 variants. *D. melanogaster* males used in these experiments developed at 25°C, were collected on the day of  
 280 adult eclosion and aged at the given temperatures (18°C, 25°C or 29°C). Ten males were collected at each  
 281 time-point for *Wolbachia* titre measurement using qPCR. *Wolbachia* titres were normalized to that of 0-1  
 282 days-old wMelCS\_b-infected males. A replicate of the experiment is shown in S10 Fig. Exponential models  
 283 were used to estimate *Wolbachia* doubling time, using both full replicates, and a summary of the results is  
 284 given in Table 1. Each dot represents the relative *Wolbachia* titre of a single male.  
 285

286 To analyse proliferation during adult life, we fitted an exponential model to the titres over  
 287 adult age and estimated doubling time of the *Wolbachia* variants, at different temperatures  
 288 (Table 1). *Wolbachia* doubling time varies widely with *Wolbachia* variant and temperature,  
 289 from approximately one day to seventeen days. A model with all the data shows a complex  
 290 interaction between proliferation, *Wolbachia* variant and temperature (Imm,  $p < 0.001$ ). We  
 291 analysed this dataset by comparing specific set of variants to test differences between  
 292 wMelOctoless and wMelCS\_b, differences between wMelPop2 and wMelCS\_b, and  
 293 differences between levels of Octomom amplification in wMelPop and wMelPop2.  
 294

295 **Table 1 - Doubling time of *Wolbachia* variants in larvae and adults at different temperatures.**

|                       | Doubling time - days (95% confidence interval) |                        |                       |                     |
|-----------------------|------------------------------------------------|------------------------|-----------------------|---------------------|
|                       | Larvae                                         |                        | Adults                |                     |
|                       | 25°C                                           | 18°C                   | 25°C                  | 29°C                |
| wMelCS_b              | 0.68<br>(0.55-0.91)                            | 16.79<br>(13.29-22.79) | 13.90<br>(9.84-23.62) | 4.07<br>(3.35-5.17) |
| wMelOctoless          | 0.50<br>(0.42-0.61)                            | 9.41<br>(8.20-11.04)   | 10.46<br>(7.99-15.16) | 3.37<br>(2.86-4.10) |
| wMelPop2 (3 copies)   | n.d.                                           | 17.68<br>(13.84-24.45) | 3.50<br>(3.02-4.15)   | 1.28<br>(1.13-1.48) |
| wMelPop2 (8-9 copies) | 0.59<br>(0.48-0.75)                            | 11.86<br>(10.00-14.56) | 2.26<br>(1.74-3.22)   | 1.07<br>(0.92-1.28) |
| wMelPop (2-3 copies)  | n.d.                                           | 15.44<br>(12.43-20.36) | 5.30<br>(4.50-6.44)   | 1.38<br>(1.22-1.60) |
| wMelPop (8-9 copies)  | n.d.                                           | 13.82<br>(11.33-17.70) | 2.79<br>(2.04-4.43)   | 0.88<br>(0.76-1.02) |

296 n.d. – not determined

297

298 A direct comparison between wMelOctoless with wMelCS\_b shows that this new variant  
 299 replicates faster than wMelCS\_b (Imm,  $p < 0.001$ ), although it is a relatively small  
 300 difference at all temperatures (in the full model with all variants, however, the proliferation  
 301 of wMelOctoless and wMelCS\_b is only statistically different at 18°C, Table 1). Both strains

302 interact equally with temperature. Their growth rate does not significantly change between  
303 18°C and 25°C ( $p = 0.94$ ), but increases at 29°C ( $p < 0.001$ ).

304 A comparison of *wMelPop2* having high and low Octomom copy number with *wMelCS\_b*  
305 and *wMelOctoless* shows that these variants with Octomom amplification have the highest  
306 growth rates at 25°C and 29°C ( $p < 0.001$  for all comparisons of *wMelPop2* (3 or 8-9  
307 copies) compared to *wMelCS\_b* and *wMelOctoless*). At 18°C *wMelPop2* with 3 copies of  
308 Octomom has a growth rate similar to *wMelCS\_b* ( $p = 0.79$ ) and lower than *wMelOctoless*  
309 ( $p < 0.001$ ). While at this temperature the growth rate of *wMelPop2* with 8-9 copies of  
310 Octomom is not significantly different from either *wMelCS\_b* or *wMelOctoless* ( $p > 0.088$  in  
311 both comparisons), and the estimated value is in-between the two (Table 1). The analysis  
312 also shows a strong interaction between *wMelPop2* growth and temperature. Both low and  
313 high Octomom copy number *wMelPop2* growth rates increase from 18°C to 25°C, and  
314 from 25°C to 29°C ( $p < 0.001$  for these comparisons).

315 To test the effect of the degree of Octomom amplification on growth rate and differences  
316 between *wMelPop* and *wMelPop2*, we compared these variants with low or high copy  
317 number of the Octomom region. The variants with the high copy number have a higher  
318 growth rate than the variants with low copy number at all temperatures ( $p < 0.025$  at all  
319 temperatures). These results confirm that the degree of amplification of the Octomom  
320 region controls the intensity of the over-proliferation of these variants, as shown before  
321 [17]. Both low and high Octomom copy number *wMelPop* and *wMelPop2* increase growth  
322 rate with temperature ( $p < 0.001$  for low and high copy number variants compared  
323 between 18°C and 25°C, and between 25°C and 29°C), confirming the analysis above.

324 The statistical model comparing *wMelPop* and *wMelPop2*, which differ in two SNPs (see  
325 above), indicated a significant difference in growth between them at 25°C ( $p < 0.001$ ). This  
326 could indicate that these two SNPs also influence growth of *Wolbachia*. However, this  
327 could also be due to the fact that the copy number of the Octomom region was not equally  
328 controlled in *wMelPop* and *wMelPop2* lines during these experiments. *wMelPop* low copy  
329 number line had 2-3 copies of Octomom, while the *wMelPop2* line had 3 copies. To test if  
330 *wMelPop* and *wMelPop2* indeed vary in proliferation rate, we repeated this experiment  
331 with a more tightly controlled Octomom copy number in these two lines, at 25°C (S12 Fig  
332 A-B). Both *wMelPop* and *wMelPop2* carrying 3 copies of Octomom grow faster than  
333 *wMelCS\_b* (Imm,  $p < 0.001$  for both) and there is no difference in growth between them ( $p$   
334 = 0.39). This indicates that the genetic differences between these lines do not affect their  
335 growth and that they are equally influenced by Octomom copy number.

336 Overall, the data and analysis show a complex interaction between *Wolbachia* variants,  
337 temperature and growth rate. There is a strong interaction between temperature and the  
338 increased proliferation of variants with amplification of the Octomom region, *wMelPop* and  
339 *wMelPop2*, when compared with *wMelCS\_b*. The effect of the amplification is not  
340 significant at 18°C and becomes increasingly stronger at higher temperatures. On the  
341 other hand, loss of Octomom leads to a smaller effect in growth, but similar at all  
342 temperatures, when compared with *wMelCS\_b*. Therefore, although both genomic  
343 mutations lead to an increase in *Wolbachia* titres they have different impacts in the growth  
344 rates and interaction with temperature.

345

### 346 **Rapid proliferation of *Wolbachia* during the host development**

347 We also analysed the growth of *wMelCS\_b*, *wMelOctoless* and *wMelPop2* (8-9 Octomom  
348 copies) during host development. *D. melanogaster* develops from egg to adult in only 10  
349 days, at 25°C. We predicted that *Wolbachia* would grow much faster during this period  
350 than during adult life, considering changes in *Wolbachia* loads from eggs to adults [29].  
351 We, therefore, estimated absolute numbers of *Wolbachia* genome copies in individuals at  
352 the different stages of development using qPCR for the single copy gene *wsp* and a  
353 calibration curve using a plasmid with *wsp* cloned. Assuming one chromosome per  
354 *Wolbachia* cell [30], these numbers correspond to *Wolbachia* cells. Embryos with 0-2h  
355 have between 2,300 and 3,100 *Wolbachia* genome copies, with no significant difference  
356 between *Wolbachia* variants (lm,  $p = 0.87$  for the effect of *Wolbachia* variant, Fig 4, Table  
357 2). At the end of development, newly eclosed adults carry from approximately 400,000 to  
358 3,200,000 *Wolbachia* genome copies. At this stage, however, and as observed above (S11  
359 Fig), there are significant differences between the three variants (lm,  $p < 0.008$  for all  
360 comparisons, Table 2, Fig 4). Also, males carry less *Wolbachia* than females ( $p = 0.033$ ).

361

362

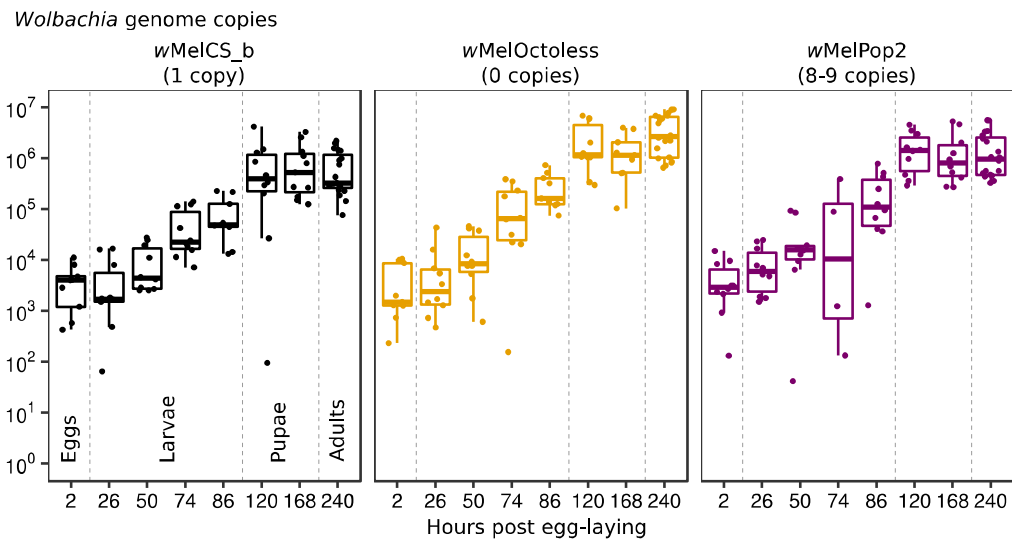

363

364 **Fig 4. *Wolbachia* proliferates rapidly during larval development.**

365 *Wolbachia* genome copies throughout *D. melanogaster* development. Samples are embryos (2h), 1<sup>st</sup> instar  
 366 larvae (26h), 2<sup>nd</sup> instar larvae (50h), 3<sup>rd</sup> instar larvae (74h and 86h), white prepupae (120h), P8 staged pupae  
 367 (168h), and newly eclosed adults (240h). Vertical dashed lines separate developmental stages (i.e. eggs,  
 368 larvae, pupae, and adults). Dots represent either a pool of 10 individuals (embryos and larvae) or a single  
 369 individual (pupae and adults). The x-axis is not in a continuous scale. Proliferation of the different *Wolbachia*  
 370 variants in the first 120 hours was analysed using an exponential model. A summary is given in Table 1.  
 371

371

372 **Table 2 - *Wolbachia* genome copies in embryos and newly eclosed adult flies.**

373

|         | Genome copy number (95% confidence interval) |                                    |                                     |
|---------|----------------------------------------------|------------------------------------|-------------------------------------|
|         | <i>Wolbachia</i> variants                    |                                    |                                     |
|         | wMelCS_b                                     | wMelOctoless                       | wMelPop2                            |
| Embryos | 3,070<br>(1,220-7,730)                       | 2,310<br>(920-5,800)               | 3,070<br>(1,280-7,380)              |
| Adults  |                                              |                                    |                                     |
| Males   | 364,000<br>(222,000-597,000)                 | 2,083,000<br>(1,290,000-3,363,000) | 826,000<br>(512,000-1,334,000)      |
| Females | 544,000<br>(309,000-958,000)                 | 3,169,000<br>(1,780,000-5,580,000) | 1,808,000<br>(1,027,000 -3,184,000) |

374

375

376 *Wolbachia* growth seems to be restricted to the period between egg and white prepupae  
 377 (120h), since there is no significant growth from this stage to adults (lm,  $p = 0.46$ ). From  
 378 eggs to white prepupae there is rapid exponential growth of all variants (Fig 4, Table 1).  
 379 wMelCS\_b has an estimated doubling time of approximately 16h, wMelPop2 of 14h, and  
 380 wMelOctoless of 12h. These different doubling times probably explain how *Wolbachia*  
 381 reach different amounts per individual host in adults, starting from the same estimated  
 382 amount in embryos. However, in this analysis the difference between growth rates is not  
 383 statistically significant ( $p = 0.12$  for interaction between *Wolbachia* variants and growth).

384 The growth rates of these variants are, therefore, very similar during this stage, and much  
385 faster than in adults. At the same temperature, we estimated doubling times in adults of  
386 *wMelCS\_b*, *wMelOctoless*, and *wMelPop2* (high-copy) to be, approximately, 13.9, 10.5,  
387 and 2.3 days, respectively (Table 1). Therefore, *Wolbachia* growth at different stages of *D.*  
388 *melanogaster* can vary dramatically, and the different variants respond differently to  
389 different stages of the host life cycle.

390 We also asked if *Wolbachia* Octomom copy number changed in *wMelCS\_b* and  
391 *wMelPop2*, throughout development, as *Wolbachia* is proliferating fast, and found no  
392 evidence of so (lm,  $p = 0.49$ , S13A Fig). However, during adult life there was a small  
393 increase of Octomom copy number with age in *wMelPop* and *wMelPop2* (an increase of  
394 0.032 per day, lmer,  $p = 0.009$ , S13B Fig), as shown before [31].

395

### 396 ***Wolbachia* variants with a deletion or amplification of the Octomom region induce** 397 **different life-shortening phenotypes**

398 The over-proliferation of *wMelPop* has been associated with a shortening of the host  
399 lifespan [16,22]. We, therefore, tested if these new over-proliferative variants also shorten  
400 the lifespan of their host, at different temperatures, in males (Fig 5A-D, S14A-C Fig). We  
401 also performed this assay in females at 25°C, with similar results to males at 25°C (S14D-  
402 E Fig). There was a significant interaction between *Wolbachia* variant and temperature  
403 (Cox proportional hazard model with mixed effects (CHR),  $p < 0.001$ ). All lines, including  
404 the *Wolbachia*-free line have a shorter lifespan at 25°C than at 18°C, and even shorter at  
405 29°C ( $p < 0.001$  for all these comparisons). *wMelCS\_b* did not affect the host lifespan at  
406 any temperature ( $p > 0.16$  for all comparisons with the *Wolbachia*-free line).

407 *wMelOctoless* strongly reduces host lifespan at all tested temperatures ( $p < 0.001$ , each  
408 comparison with *wMelCS\_b*) (Fig 5A-D, S14 Fig). This deleterious effect is stronger at  
409 18°C, where *wMelOctoless* is the tested variant with the highest impact on lifespan,  
410 although very similar and not statistically different from *wMelPop2* with high Octomom  
411 copy number ( $p < 0.001$ , for all comparisons with other lines,  $p = 1$  when compared with  
412 *wMelPop2* with 8-9 Octomom copies). The effect of *wMelOctoless* on host lifespan is  
413 weaker at 25°C than at 18°C ( $p = 0.001$ ), and similar at 25°C and 29°C ( $p = 0.95$ ). These  
414 results demonstrate that the new over-proliferative *wMelOctoless* also has a cost to the  
415 host in terms of lifespan and this effect interacts with temperature, being stronger at lower  
416 temperature.

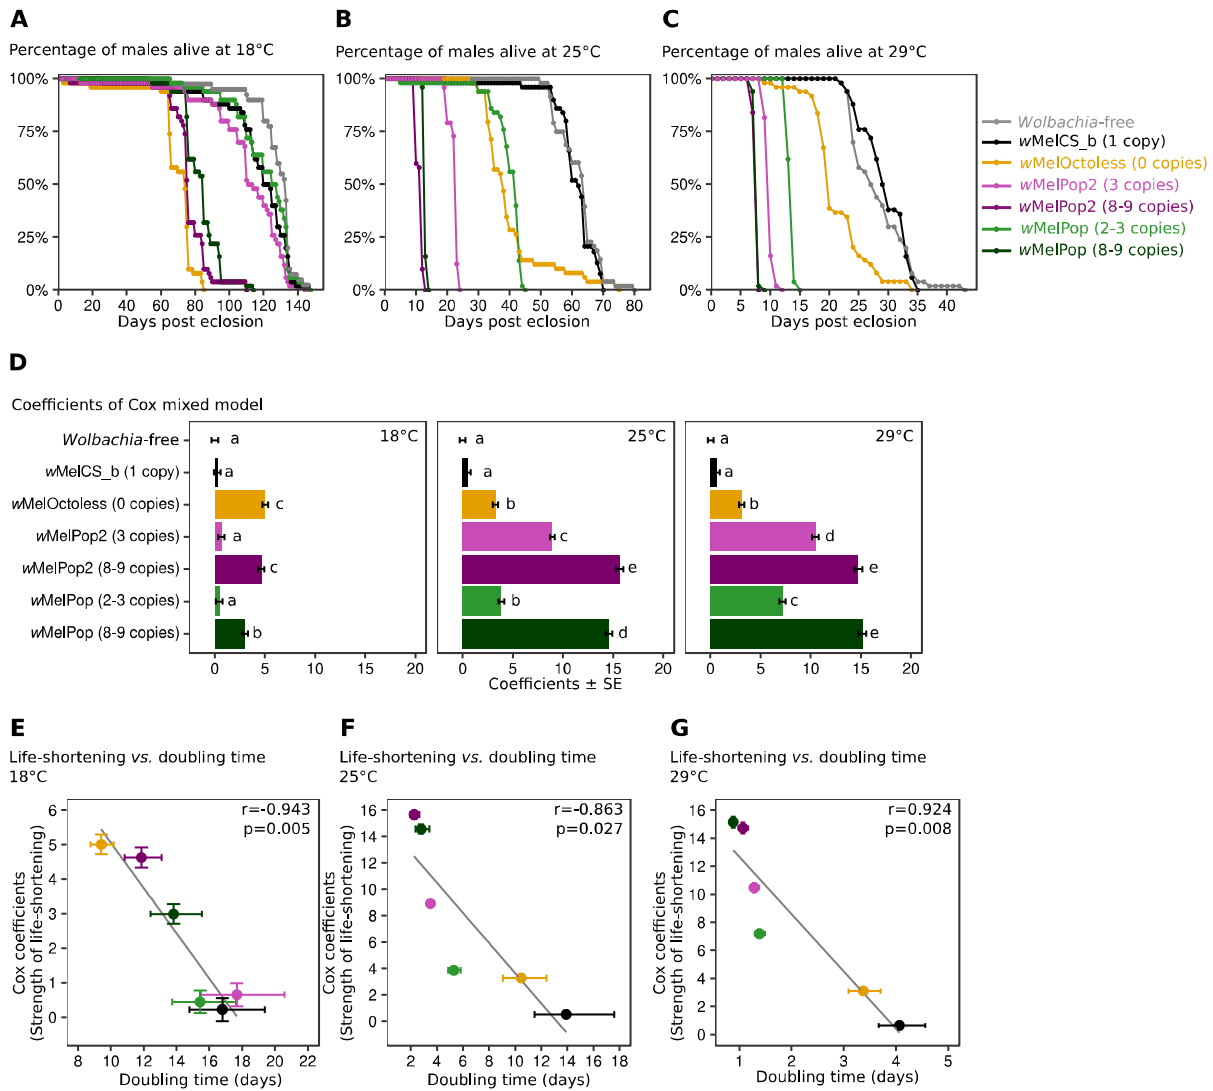

417

418 **Fig 5. wMelOctoless and wMelPop2 are pathogenic.**

419 Lifespan of males with different *Wolbachia* variants at 18°C (A), 25°C (B), and 29°C (C). For survival  
 420 analyses, fifty males were collected on the day of eclosion and kept in groups of 10 per vial until all flies died.  
 421 Flies were transferred to new vials every five days. A full replicate of these experiments is shown in S14A-C  
 422 Fig. (D) Coefficients of a Cox mixed model, which represent the effect of *Wolbachia* on the lifespan of flies  
 423 relative to the lifespan of *Wolbachia*-free flies. Both experimental replicates were analysed together. Bars  
 424 represent the standard error of the coefficient, and letters statistically significant groups after  $p$ -value  
 425 correction. (E-G) Correlation between the strength of life-shortening phenotype and *Wolbachia* doubling time  
 426 at 18°C (E), 25°C (F), and 29°C (G). The y-axis represents the strength of *Wolbachia* life-shortening  
 427 phenotype (estimated using Cox mixed models) and the x-axis the *Wolbachia* doubling time (in days). The  
 428 Pearson correlation coefficient ( $r$ ) and its significance ( $p$ ) are given in each panel.  
 429

430 wMelPop2, similarly to wMelPop, also shortens host lifespan (Fig 5, S14 Fig). The variants  
 431 containing high copy number of Octomom (8-9 copies) shorten lifespan at all temperatures  
 432 ( $p < 0.001$ , for each comparison with wMelCS\_b). This effect is much stronger at 25°C  
 433 than at 18°C ( $p < 0.001$  for contrasts between both lines, and wMelCS\_b), and similar at  
 434 25°C and 29°C ( $p > 0.21$  for these contrasts). At these two higher temperatures the lines  
 435 carrying the variants with high copy number of Octomom have the shortest lifespan of all



436 tested lines ( $p < 0.001$  for all comparisons). *wMelPop2* and *wMelPop* with low copy  
437 number of Octomom (2-3 copies) always have a weaker effect on host lifespan shortening  
438 than high copy number variants ( $p < 0.001$  for all these comparisons). As observed with  
439 the high copy number variants, their effect increases with temperature, being stronger at  
440 25°C than at 18°C, and even stronger at 29°C ( $p < 0.05$  for these comparisons). In fact,  
441 *wMelPop2* and *wMelPop* with low copy number are only pathogenic at 25°C and 29°C, not  
442 at 18°C. These data confirm the association of Octomom region amplification with host  
443 lifespan shortening, and the increase in the severity of this phenotype with an increase in  
444 Octomom copy number, and an increase in temperature.

445 In some comparisons *wMelPop2* and *wMelPop* differ significantly in their pathogenic  
446 phenotype (Fig 5D). This could indicate that there were differences in this phenotype  
447 between these two lines. Therefore, and as done above in the analysis of proliferation, we  
448 repeated this experiment comparing the lifespan phenotype in *wMelPop2* and *wMelPop*  
449 lines with a tightly controlled Octomom copy number (S12 Fig). At 25°C lines both  
450 *wMelPop* and *wMelPop2* with 3 copies of the Octomom region had a shorter lifespan than  
451 the line with *wMelCS\_b* ( $p < 0.001$ ), and no difference between them ( $p = 0.29$ ). These  
452 results show that *wMelPop2* and *wMelPop* have the same phenotype.

453 To further demonstrate that the life shortening phenotypes were due to the new *Wolbachia*  
454 variants, and not to EMS-induced mutations in the host nuclear genome, we performed  
455 reciprocal crosses between flies carrying *wMelCS\_b* and flies carrying either  
456 *wMelOctoless* or *wMelPop2* (with 3 or 8-9 copies of Octomom) and followed the survival of  
457 their female progeny at 29°C. The female progeny from reciprocal crosses should be  
458 identical in the nuclear genome but differ in the *Wolbachia* variant, which is maternally  
459 transmitted. The life-shortening phenotype segregated maternally, thus demonstrating that  
460 the *Wolbachia* variants carried by the lines are the cause of the phenotypes (S15 Fig). The  
461 relative strength of the life-shortening phenotype of the progeny of the reciprocal crosses  
462 matches the strength of the phenotypes in the maternal lines, observed in Fig 5 and S14  
463 Fig. Moreover, all the tested lines that inherited *wMelCS\_b* had a similar lifespan ( $p > 0.78$   
464 for all comparisons), indicating, as expected, no contribution of the host genotype in this  
465 set of experiments.

466 The life shortening phenotype of *wMelPop* has been associated with its over-proliferation  
467 and higher titres since its discovery [22]. We tested if these phenotypes were correlated by  
468 taking advantage of the data on titres, proliferation and lifespan shortening that we  
469 collected from this set of variants at different temperatures. We found a negative

470 correlation between the strength of the life-shortening phenotype and *Wolbachia* doubling  
471 time, at all temperatures (Fig 5,  $|r| > 0.86$ ,  $p < 0.027$ , for all correlations). However, we  
472 found no significant correlations between the strength of the life-shortening phenotype and  
473 *Wolbachia* titres in 0-1 days-old adults (S16 Fig,  $p > 0.05$  for all correlations). These results  
474 show that over-proliferative variants shorten the host lifespan and the strength of this  
475 phenotype correlates with their proliferation rates.

476

#### 477 ***Wolbachia* variants with deletion or amplification of the Octomom region provide** 478 **stronger protection against DCV**

479 Previous studies established a link between *Wolbachia* titres and the strength of anti-viral  
480 protection [16–20]. To test if *wMelOctoless* and *wMelPop2* also provide a stronger  
481 protection against viruses, we infected flies with *Drosophila C virus* (DCV), by pricking, and  
482 followed their survival for 40 days at 18°C. All *Wolbachia* variants tested provided  
483 protection against DCV (CHR,  $p < 0.001$  for all comparisons with the *Wolbachia*-free line,  
484 Fig 6A-B and S17A Fig), while survival of *Wolbachia*-carrying flies did not differ from  
485 control when pricked with buffer, in this time frame (S17B-D Fig,  $p = 0.52$  for *Wolbachia*  
486 variant effect). *wMelCS\_b* was the least protective variant, while *wMelOctoless* was the  
487 one providing the highest protection. In general, the over-proliferative *Wolbachia* variants  
488 confer stronger protection to DCV than *wMelCS\_b*, although this difference is not always  
489 significant (Fig 6B,  $p < 0.001$  for all comparisons, except for *wMelPop* (2-3 copies),  $p =$   
490 0.11).

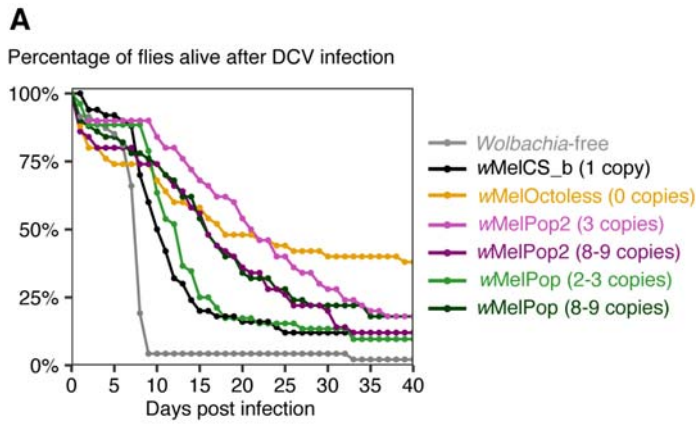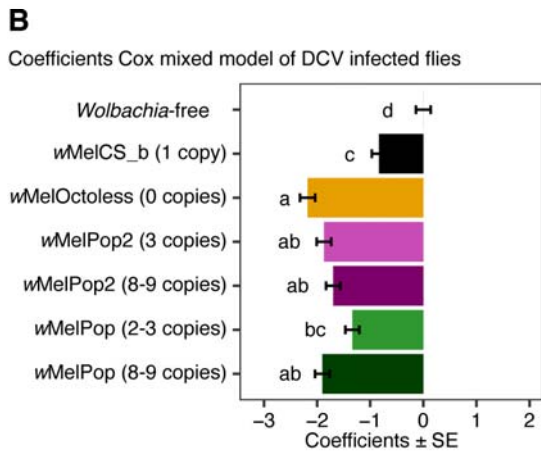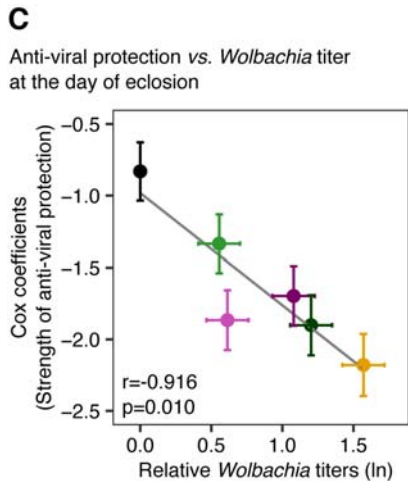

491  
492  
493  
494  
495  
496  
497  
498  
499  
500  
501  
502  
503  
504

**Fig 6. *wMelOctoless* and *wMelPop2* provide strong protection against DCV.**

(A) Survival of males carrying different *Wolbachia* variants after a challenge with DCV. Fifty 3-5 days-old *Drosophila* males, per line, were pricked with DCV ( $10^9$  TCID<sub>50</sub>/ml) and survival curves were determined at 18°C for 40 days. A replicate of the experiment and the buffer-pricked controls are shown in S17 Fig. (C) Coefficients of Cox mixed models of DCV-infected flies. Cox coefficients represent the effect of *Wolbachia* infection on survival relative to the *Wolbachia*-free flies. Bars represent the standard error of the estimate, and the letters the statistical significant groups after *p*-value correction. *Wolbachia* infection improved the survival of DCV-infected flies ( $p < 0.001$ ). (C) Correlation between the strength of anti-viral protection (represented as the coefficients of a Cox mixed model in the y-axis) and the natural log of *Wolbachia* titres at the day of eclosion, as a proxy for *Wolbachia* titre in the day of infection. The Pearson correlation coefficient (*r*) and its significance (*p*) are given in the panel.

505 We also tested the correlation between the antiviral protection and *Wolbachia* proliferation,  
506 but we found no correlation neither with proliferation estimates at 18°C ( $p = 0.21$ ), the  
507 temperature in which the flies were kept after infection, nor at 25°C ( $p = 0.35$ ), the  
508 temperature in which flies developed and were kept until being infected with DCV (S16D-E  
509 Fig). However, there is a significant correlation between the strength of *Wolbachia*-induced  
510 antiviral protection and *Wolbachia* titres in 0-1 days-old flies, a proxy for *Wolbachia* titre at  
511 the day of infection, which is 3-5 days-old flies (Fig 6C,  $p = 0.010$ ,  $|r| = 0.92$ ). Overall, the  
512 new over-proliferative variants give more protection to viruses than *wMelCS\_b*, and the  
513 strength of this protection is correlated with *Wolbachia* levels at the time of infection.

514

## 515 Discussion

516 We developed a new forward genetic screen and identified new *Wolbachia* over-  
517 proliferative variants. We characterized in detail two of these new mutants, *wMelPop2* and  
518 *wMelOctoless*, and identified the genetic bases of their over-proliferation. *wMelPop2* had  
519 an amplification of the Octomom region, which has been previously shown to lead to over-  
520 proliferation in the *wMelPop* variant [16,17]. *wMelOctoless*, on the other hand, had a  
521 deletion of this same Octomom region. These results further confirm and develop the  
522 complex role of this genomic region in the control of *Wolbachia* proliferation. An extensive  
523 phenotypic characterization of two of these lines showed both *Wolbachia* variants to  
524 shorten the host lifespan, as well as to increase antiviral protection. Moreover, we show  
525 that *Wolbachia* proliferation rate in *D. melanogaster* depends on the interaction between  
526 Octomom copy number, the host developmental stage, and temperature. Our analysis also  
527 suggests that the *Wolbachia*-induced life shortening and antiviral protection phenotypes  
528 are dependent on its rate of proliferation in adults and titres near the time of infection,  
529 respectively. These are related, but different, properties of the endosymbiont.

530

## 531 An unbiased approach for genetically intractable symbionts

532 Given their dependence on the intracellular niche, *Wolbachia* and most endosymbionts  
533 remain non-culturable and genetically intractable, hindering their study. Here we aimed at  
534 mutagenizing and screening for new *Wolbachia* variants in the host. We expected that a  
535 main difficulty of this approach would be how to identify, via its phenotype, a new mutant  
536 present in the *Wolbachia* population within a host. We estimated here that a newly  
537 emerged *wMelCS\_b*-carrying female harbours approximately 540,000 *Wolbachia* genome

538 copies, which probably corresponds to the same number of *Wolbachia* cells [30]. Since  
539 EMS induces random mutations, we expected mosaicism in the *Wolbachia* population at  
540 the individual fly level. Each new mutant, when generated, would be a unique cell within  
541 these approximately half a million other *Wolbachia* cells. Since the *Wolbachia* phenotypes  
542 are normally measured at the individual host levels (e.g. *Wolbachia* titres, antiviral  
543 protection), the properties of individual or small numbers of mutant *Wolbachia* could be  
544 diluted and unmeasurable.

545 We hypothesized, however, that over-proliferating *Wolbachia* cells could overtake the  
546 population and that the resulting higher titres could be detectable. Indeed, fast proliferative  
547 *Wolbachia* can be selected at the level of a single host [31]. To increase the probability of  
548 isolating rare over-proliferating *Wolbachia* variants, we also relied on the bottleneck  
549 imposed in the vertical transmission of *Wolbachia*. We calculated here that single embryos  
550 carry approximately 3,000 *Wolbachia* genomes, which is consistent with previous  
551 estimates [29]. We also treated flies with tetracycline before mutagenesis to further reduce  
552 the *Wolbachia* population. We expected this additional endosymbiont titre reduction to  
553 enhance genetic drift and potentially enrich or lead to the fixation of rare *Wolbachia*  
554 variants. By screening at the immediate progeny (F1) of EMS-treated females or three  
555 generations later (F4) we were able to select new over-proliferative *Wolbachia* mutants.

556

### 557 **Genetic bases of *Wolbachia* over-proliferation**

558 After discarding the possibility that mutations in the host nuclear or mitochondrial genomes  
559 were the cause of *Wolbachia* over-proliferation, we performed *de novo* assembly of the  
560 ancestral, *wMelCS\_b*, and the new mutant variants, *wMelPop2* and *wMelOctoless*. *wMel*  
561 and *wMelPop* were also assembled. The assemblies generated complete full  
562 chromosomes of these *Wolbachia* and allowed us to identify single nucleotide differences  
563 and structural differences between these genomes. To validate our genome assembly  
564 pipeline we compared our *wMel* genome assembly to the reference *wMel* genome. We  
565 identified only seven indels and two SNPs, which we confirmed to be present in our line,  
566 by Sanger sequencing. Our assembly results also showed two previously identified SNPs  
567 between *wMelCS\_b* (but also the new *wMelCS\_b* derived variants *wMelOctoless* and  
568 *wMelPop2*) and *wMelPop*. Additionally, our assembly provides an improvement over the  
569 previous *wMelPop* genome [25].

570 The only differences between the new over-proliferative variants and *wMelCS\_b* were  
571 structural differences in the Octomom region. *wMelPop2* has an amplification of this

572 region. The assembly confirms that the Octomom region is amplified in tandem [17], and  
573 that all copies are located in the *Wolbachia* genome. Previously we showed that  
574 amplification of the Octomom region and the degree of this amplification determined  
575 *wMelPop* over-proliferative phenotype [16,17]. Moreover, reversion of *wMelPop* Octomom  
576 copy number to one, through selection, resulted in loss of both over-proliferation and cost  
577 to the host, making the variant phenotypically identical to *wMelCS\_b*, which also carries a  
578 single copy of Octomom [17]. We now show that Octomom amplification in *wMelCS\_b* also  
579 leads to an over-proliferative phenotype. Moreover, *wMelPop* and *wMelPop2* variants,  
580 carrying the same copy number of Octomom, have identical phenotypes. These findings  
581 are unsurprising since *wMelCS\_b*, the ancestral of *wMelPop2*, and *wMelPop* share an  
582 almost identical genome, differing on two synonymous SNPs and Octomom  
583 amplification. Hence, our results further confirm the role of amplification of Octomom  
584 region in the over-proliferation of *Wolbachia*.

585 *wMelOctoless*, on the other hand, has a deletion of the entire Octomom region. The  
586 deletion leaves behind one of the direct repeats flanking the Octomom region [16],  
587 suggesting that excision might have been mediated by recombination. The causal link  
588 between Octomom deletion and over-proliferation is further supported by an additional  
589 independent over-proliferative variant isolated in the screen, *wMelOctoless2*. This  
590 *Wolbachia* variant also has a deletion of Octomom as the only difference with *wMelCS\_b*.  
591 These data show that deletion of the Octomom region also leads to an over-proliferative  
592 phenotype in *Wolbachia*. Thus, we identified the second known *Wolbachia* mutation with a  
593 clear link between genotype and phenotype.

594 The mutations identified in the new variants are deletions and amplifications. We did not  
595 detect any new SNPs in these variants, even if EMS is expected to mainly induce single  
596 nucleotide mutations [32]. Thus, it is possible that the deletion or amplification of the  
597 Octomom region in these over-proliferative variants were independent of the EMS  
598 treatment. For instance, loss of the Octomom region has been twice reported, in cell  
599 culture [25,33], suggesting that it may occur spontaneously. Yet, chemical mutagens such  
600 as EMS can activate DNA damage response and transposable elements [34], and some  
601 genes of the Octomom region and its flanking genes are predicted to be potentially involved  
602 in transposition and DNA repair [16]. Therefore, we cannot rule out that the EMS treatment  
603 induced the mutations in this genomic region.

604

## 605 **Opposing mutations lead to a similar *Wolbachia* over-proliferative phenotype**

606 Both the deletion or the amplification of the Octomom region causing an over-proliferative  
607 phenotype seems to be a paradox. The resolution of this paradox and the mechanisms  
608 leading to these phenotypes will rely on the functional characterization of genes in the  
609 Octomom region. These genes may be involved in interaction with the host, transcriptional  
610 regulation or DNA repair [16].

611 One possibility is that the amplification of the Octomom region and over-expression of a  
612 particular set of genes in this region lead, mechanistically, to the same result as the  
613 absence of the genes. There are many examples of over-expression of a gene leading to a  
614 dominant negative phenotype. For instance, both over-expression or loss of a protein  
615 forming a gradient, abolish the gradient [35]. Also, over-expression of a member of protein  
616 complex may lead to loss of stoichiometry and therefore loss of functional complexes [36].  
617 Another possibility is that the loss and amplification of different genes in the Octomom  
618 region lead to the over-proliferative phenotype. The second hypothesis is supported by the  
619 fact that *wMelPop2* and *wMelOctoless* have similar but not identical phenotypes, and  
620 interact differently with temperature. Furthermore, *wMelPop* and *wMelPop2* have a higher  
621 rate of proliferation than *wMelOctoless* at 25°C and 29°C. Therefore, at these  
622 temperatures, the phenotype of Octomom amplification is stronger than the phenotype  
623 associated with the Octomom region loss-of-function.

624 Although complex, these results help to explain some of the data from an over-proliferative  
625 variant trans-infected in *Aedes aegypti*. The *D. melanogaster* variant *wMelPop* was  
626 transinfected into *Aedes albopictus* cells, and then transinfected into *A. aegypti*. In the  
627 process of cell culture adaptation the Octomom region, which was amplified in *wMelPop*,  
628 was deleted [25]. The *wMelPop*-PGYP variant in *A. aegypti* lacks, therefore, the Octomom  
629 region. Nonetheless, this variant still over-proliferates and is highly pathogenic in *A.*  
630 *aegypti* [21]. If one assumed the same genetic basis for the pathogenicity of *wMelPop* in  
631 *D. melanogaster* and *wMelPop*-PGYP in *A. aegypti*, one might conclude that the Octomom  
632 region was not related with these phenotypes [25]. However, similarly to  
633 *wMelPop*/*wMelPop*-PGYP variants our results with *wMelCS\_b* and the mutant variants  
634 show that both amplification and deletion of the Octomom region lead to increased  
635 *Wolbachia* pathogenicity. Thus, deletion of the Octomom region in *wMelPop*-PGYP may  
636 explain why this variant is also pathogenic. However, *wMelPop*-PGYP also accumulated  
637 other mutations when passaged in cell culture, and has many other genetic differences

638 with wMel [25]. These may also contribute to wMelPop-PGYP being more pathogenic than  
639 wMel in *A. aegypti*.

640 The Octomom region has the properties of a genomic island: it is not part of the *Wolbachia*  
641 core genome, since many *Wolbachia* strains lack this region, and seems to be horizontally  
642 transferred between *Wolbachia* strains [16,37,38]. Although the wMel strain can lose this  
643 region and remain viable in laboratory conditions (here and [25,33]), natural variants of  
644 wMel without Octomom are not known [39]. Its over-proliferative phenotype, and the  
645 associated shortening of host lifespan, may lead to a fitness disadvantage to a host  
646 harbouring such mutant. This in turn may lead to loss of these variants from the host  
647 natural populations. Therefore, this genomic region, absent in many other strains of  
648 *Wolbachia*, became addictive to the wMel strain through its integration in the regulation of  
649 *Wolbachia* proliferation.

650

#### 651 ***Wolbachia* proliferation, pathogenicity, and antiviral protection**

652 We found a complex interaction between temperature and proliferation of the different  
653 *Wolbachia* variants in adults. wMelOctoless proliferates faster than wMelCS\_b, to a similar  
654 extent, at all temperatures. wMelPop and wMelPop2, however, strongly interact with  
655 temperature and proliferate much faster at higher temperatures. We also confirmed here  
656 that the degree of Octomom amplification in these variants modulates the proliferation rate  
657 [17], and interacts with temperature.

658 Throughout the range of tested temperatures, the different variants have very different  
659 proliferation rates in adults. At 25°C, where we observed the highest variation, the titres of  
660 wMelPop2 double every 2 days, while wMelCS\_b titres double every 14 days. In contrast,  
661 during larval development the proliferation rates of wMelCS\_b, wMelOctoless, and  
662 wMelPop2, are very similar and much faster than in adults. During development, at 25°C,  
663 *Wolbachia* titres double every 12 to 16 hours. These results show that wMelCS\_b, which  
664 has a relatively low proliferation rate in adult flies, is capable of very fast proliferation  
665 during larval development, when the host is rapidly growing. In *Brugia malayi*, *Wolbachia*  
666 titres also increase rapidly during the first few weeks of the nematode's development [30].  
667 Thus, rapid proliferation during immature stages may be a conserved *Wolbachia* strategy  
668 to recover from the bottleneck imposed during maternal transmission. This observed  
669 coordination between wMelCS\_b proliferation and *D. melanogaster* developmental stage  
670 may be due to *Wolbachia* directly responding to host developmental cues, to differences in  
671 the metabolic profile of larvae and adults, or to differences in host cell divisions rates.



672 *Wolbachia* could also control its proliferation in response to its own population density  
673 within the host.

674 While wMelPop and wMelPop2 proliferate similarly to wMelCS\_b during larval stages, they  
675 over-proliferate in adults. Thus, this over-proliferative phenotype of variants with  
676 amplification of the Octomom region can be interpreted as an inability to properly respond  
677 to the conditions of the host adult stage. On the other hand, the deletion of Octomom  
678 seems to lead to a similar increase in the proliferation rate during development and adult  
679 life, although the difference with wMelCS\_b is not significant during development in our  
680 analysis.

681 The new over-proliferative variants shorten the lifespan of *D. melanogaster*, as wMelPop  
682 does. Furthermore, we showed this phenotype to result from the interaction of *Wolbachia*  
683 genotype and temperature. wMelOctoless had a similar life shortening phenotype at all  
684 temperatures, although it was stronger at 18°C. wMelPop and wMelPop2 responded  
685 strongly to temperature, being much more costly at higher temperatures, as shown before  
686 for wMelPop [17,22,40]. The extent of Octomom amplification also influenced this  
687 interaction. While low copy number variants had no phenotype at 18°C, the high copy  
688 number wMelPop and wMelPop2 are pathogenic also at this temperature. Therefore these  
689 variants can also be pathogenic at 18°C, contrary to previous data [28,40,41]. Interestingly,  
690 we find at all temperatures a significant correlation between the proliferation rate of the  
691 *Wolbachia* variants and the life shortening phenotype. The faster the variants proliferate  
692 the shorter the host lifespan.

693 All the over-proliferative variants also increased antiviral resistance, with wMelOctoless  
694 conferring the strongest protection. This phenotype correlated poorly with proliferation  
695 rates at 25°C or 18°C, the temperature before and after infection with DCV, respectively.  
696 However, the strength of the antiviral resistance correlated with the titres of *Wolbachia*  
697 near the day of infection. Thus, the cost of harbouring *Wolbachia* in terms of lifespan, and  
698 the benefit of the antiviral protection, correlate with related but different parameters. In the  
699 future it will be important to understand why these different correlations. For instance,  
700 *Wolbachia* titres at the point of viral infection are probably important because the anti-viral  
701 protection is observed early in the infection [42]. *Wolbachia* proliferation rate could impact  
702 longevity either by the cumulative cost of the proliferation process itself or by determining  
703 the time to reach a lethal threshold of *Wolbachia* titres. Nonetheless, these results indicate  
704 that it may be possible to select for highly protective *Wolbachia* variants without  
705 necessarily having a high cost to the host. These would be *Wolbachia* variants with high

706 titres but low proliferation in adults. Such variants would be particularly useful in the use of  
707 *Wolbachia*-transinfected mosquito to prevent arboviruses transmission.

708

709 In summary, our results show the feasibility of forward genetic screens to study *Wolbachia*  
710 biology. Similar strategies may be used in the future to study other aspects of *Wolbachia*-  
711 host interactions or the biology of other genetically intractable endosymbionts. The new  
712 over-proliferative variant *wMelPop2* confirms the causal link between amplification of the  
713 Octomom region and *Wolbachia* over-proliferation. Whereas the new loss-of-function  
714 mutant *wMelOctoless* reveals that this region is also required to control *Wolbachia*  
715 proliferation. These results give new insight on the complex role this genomic region plays  
716 in *Wolbachia* biology. Moreover, this collection of variants, similarly to an allelic series,  
717 allow a finer dissection of the consequences of *Wolbachia* over-proliferation to the host.

718

## 719 **Materials and Methods**

### 720 **Fly genotypes, infection status, and maintenance**

721 Flies were reared on fly food, supplemented with live yeast, at 25°C, 70% humidity. Fly  
722 food was composed of molasses (37.5g/L), sugar (62.5g/L), cornflour (58.3g/L), yeast  
723 extract (16.7g/L), and agar (8.3g/L) in distilled water. The mixture was sterilized by  
724 autoclaving and cooled to 45°C. For each litre of food, we added 29.2 mL of a solution with  
725 100g of methylparaben and 0.2g of Carbendazim for 1L absolute ethanol.

726 All fly stocks used had the Drosdel *w*<sup>1118</sup> isogenic background [16,43].

727 The bacterial community associated with the fly stocks was homogenized as in Pais *et al.*  
728 [44], with minor modifications. Briefly, we collected eggs for 6 hours in fresh agar plates  
729 with live yeast and sterilized the eggs surface by consecutive washes on 2.1% sodium  
730 hypochlorite (NaOCl) solution (10 minutes), 70% ethanol (5 minutes) and sterile water (5  
731 minutes). Next, we transferred axenic eggs to sterile fly food supplemented with 40µL of  
732 1:1 overnight culture of *Acectobater* OTU 2753 and *Lactobacillus* OTU 1865 [44]. We  
733 confirmed the presence of these bacterial species by squashing five females aged 3–6  
734 days in sterile 1x PBS, plating 30µL of the lysate in mannitol plates, incubate them at 25°C  
735 for 72h, and identify bacteria by colony morphology.

736

737 **Selection of *D. melanogaster* lines carrying *Wolbachia* with specific Octomom copy**  
738 **number**

739 To select for flies carrying *wMelPop* and *wMelPop2* with a desired Octomom copy number,  
740 we proceeded as in Chrostek and Teixeira [17], with minor modifications. Briefly, we  
741 allowed 5–20 virgin females to cross with 2–3 *Wolbachia*-uninfected males of the Drosdel  
742 *w*<sup>1118</sup> isogenic background in individual vials, and lay eggs for 3-4 days. Females were  
743 then collected in individual tubes for DNA extraction and Octomom copy number  
744 determination by qPCR. The progeny of females with specific copy numbers were then  
745 followed-up.

746

747 **Determination of time for *Wolbachia* titres recovery**

748 Flies with *wMelCS\_b* developed in fly food supplemented with tetracycline at the  
749 concentrations 1.5625µg/ml, 3.125µg/ml, 6.25µg/ml, 12.5µg/ml, 25µg/ml, and 50µg/ml.  
750 Three isofemale lines were established from each dose. In the F1, we randomly selected  
751 four virgin females for egg-laying and *Wolbachia* titre measurement using qPCR. From this  
752 moment on, the flies were kept on fly food without tetracycline. We set up the next four  
753 generations using the progeny of a female with the median *Wolbachia* titres.

754

755 **Forward genetic screen**

756 We attempted to mutagenize *Wolbachia in vivo* by feeding its host with the mutagen EMS.  
757 DrosDel *w*<sup>1118</sup> isogenic flies carrying *wMelCS\_b* were raised in standard fly food or fly food  
758 supplemented with tetracycline (from 1.5625 to 12.5µg/ml). Virgin females were collected,  
759 starved for 6h, and then fed EMS concentrations ranging from 10 to 8,000mM diluted in  
760 1% sucrose. Control flies fed on sucrose solution only. A dye was added to the feeding  
761 solution to confirm intake and feeding proceeded for 13h (overnight).

762 EMS-fed females (G0), and control females, were mated individually with 2–3 *Wolbachia*-  
763 free Drosdel *w*<sup>1118</sup> isogenic males, egg-laying was allowed for 3–4 days, and parents  
764 discarded. From the F1 progeny, we collected virgin females, mated them individually with  
765 2–3 *Wolbachia*-free Drosdel *w*<sup>1118</sup> isogenic males, and allowed egg laying for 3-4 days.  
766 These females were collected when 10 days old, and *Wolbachia* titres determined by  
767 qPCR. We followed the progeny of F1 females showing 50% or higher increase in  
768 *Wolbachia* titres relative to control flies in the same conditions. We have also transferred  
769 the progeny of these F1 for three more generations, without selection, and repeated the

770 determination of *Wolbachia* titres in F4 females. In the same batch of experiments we may  
771 have tested more than one F1 or F4 progeny from each G0 female. Hence, over-  
772 proliferative *Wolbachia* variants isolated in the same batch of treated females may be a  
773 result of a single event in the G0 female.

774

#### 775 **Real time quantitative PCR**

776 DNA extraction for qPCR was performed as described before [17].

777 The qPCR reactions were performed in the QuantStudio™ 7 Flex (Applied Biosystems).  
778 The reaction mix and PCR program used were described before [16]. The specificity of the  
779 amplicons was confirmed by analysing the melting curve profile.

780 Relative levels of the target genes was determined using the Pfaffl method [45]. To  
781 quantify relative *Wolbachia* titres we used *Drosophila RpL32* gene as calibrator, and  
782 *Wolbachia wsp* as the target gene. To determine the copy number of the Octomom region,  
783 *Wolbachia wsp* gene was used as the calibrator and *WD0513* used as the target gene. For  
784 determination of copy number of other Octomom region genes, or control genes, *wsp* was  
785 also used as a calibrator.

786 For absolute quantification of *Wolbachia* genome copies the full-length *Wolbachia wsp*  
787 gene was cloned into a pMT/V5 *Drosophila* expression vector (Invitrogen). The plasmid  
788 was amplified in *Escherichia coli* strain DH5- $\alpha$ , purified using midiprep (QIAGEN) and its  
789 concentration determined using Qubit® 2.0 (Thermo Fisher Scientific). Molecular weight of  
790 the plasmid was calculated assuming a nucleotide average weight of 325 Da to determine  
791 the number of plasmid molecules in the calibration curve. Standard curves of 1:10 serial  
792 dilutions were run to calibrate the assay each time.

793 Primers used in qPCR reactions are given in S8 Table.

794

#### 795 **Determination of *Drosophila* lifespan**

796 For each replicate, a total of 50 males or 50 females were collected on the day of eclosion.  
797 Flies (10 per vials) were then incubated at 18°C, 25°C or 29°C, and transferred to new  
798 fresh vials every four (females) or five (males) days. The number of dead flies was  
799 recorded daily until all the flies died. Censored observations (i.e. flies lost or trapped in the  
800 vial plug) were recorded and taken into account during data analysis.

801

## 802 **Protection against *Drosophila C* Virus**

803 We produced and titrated the *Drosophila C* virus solution as described in Teixeira *et al.* [8].  
804 We infected 50 3-5 days old males by dipping insect needles (Austerlitz Insect Pins) into a  
805 virus solution ( $10^9$  TCID<sub>50</sub>/ml in 50mM Tris-HCl, pH 7.5) and pricking flies anaesthetized  
806 under CO<sub>2</sub> in the thorax. An equal number of males were pricked with a buffer only solution  
807 (50mM Tris-HCl, pH 7.5) and served as controls. After pricking, flies were incubated in  
808 groups of 10 individuals per vial, and kept at 18°C. Survival was followed as above.

809

## 810 ***Wolbachia* proliferation during development and in adults**

811 To determine *Wolbachia* growth during development, flies carrying wMelCS\_b,  
812 wMelOctoless, and wMelPop2 (high-copy), laid eggs for 2 hours in apple juice agar plates  
813 supplemented with live yeast. Eggs were transferred to fly food-containing bottles and  
814 allowed to develop at 25°C. For *Wolbachia* titre assessment, we sampled eggs (2 hours),  
815 L1 larvae (24 hours later), newly moulted L2 larvae (48 hours later), L3 larvae (72 and 84  
816 hours), white prepupae pupae (120 hours), P8 staged pupae (168 hours), and newly  
817 eclosed adult males and females (240 hours). Ten samples per time point were analysed.  
818 Samples included ten individuals each for eggs and larvae and one individual each for  
819 pupae and adults. To collect newly molted larva, all larvae of the target stage were  
820 discarded at the respective time-point and the newly molted larvae were collected within  
821 two hours after the established time-point. The white prepupae were collected by staging  
822 and the remaining stages were collected according to the set time-point. Except for adults,  
823 which were collected within 24 hours post-emergence, all samples were collected within  
824 two hours interval.

825 For assessment of titres dynamics in adult flies, newly eclosed males, raised at 25°C, were  
826 incubated at 18°C, 25°C, and 29°C. Flies were collected every three (29°C), seven (25°C)  
827 or ten days (18°C) for *Wolbachia* titre measurement. Ten individuals were processed for  
828 each time point, and the experiment was performed twice. Each sample consisted of a  
829 single fly.

830

## 831 ***Wolbachia* genomes sequencing and quality control**

832 For *Wolbachia* genomic sequencing (Illumina and Oxford Nanopore), we enriched the  
833 sample for *Wolbachia* cells before DNA purification. To this end, approximately 500 10-  
834 days old flies were squashed for 5 minutes in 10ml Schneider's Insect Medium (Thermo

835 Fisher Scientific) using glass beads. Next, we pelleted host debris by centrifugation at  
836 1,000g for 5 min and filtered the supernatant solution through a 5µm pore. Bacterial cells  
837 were pelleted by centrifugation at 13,000rpm for 15 minutes, and DNA was extracted. All  
838 centrifugations were carried out at 4°C. DNA was extracted with a phenol-chloroform  
839 isolation protocol and resuspended in 10mM Tris-HCl (pH 8).

840 Sequencing was performed at the Genomics Facility at the Instituto Gulbenkian de  
841 Ciência, Portugal. Both Illumina and Oxford Nanopore sequencing was done on genomic  
842 DNA extracted from the same biological material. Illumina 300bp paired-end libraries were  
843 prepared using the Pico Nextera kit according to the manufacturer's instructions and  
844 sequenced with MiSeq. Data quality was assessed via FastQC v.0.11.5 [46] and reads  
845 were trimmed using Trimmomatic v.0.36 [47]. Genomic samples for Oxford Nanopore  
846 sequencing were processed with minimal shearing to maximize the size of fragments in  
847 the libraries. After ligation (kit SQK-LSK108), libraries were sequenced in MinION Mk1b  
848 portable sequencing device using SpotON flow cell (R9.4.1). The status of the sequencing  
849 pores was monitored using MinKNOW (v2.0.1). Sequencing lasted for up to 48 hours.  
850 Albacore (v2.3.1) and Porechop (v0.2.2) were used for base-calling and read trimming,  
851 respectively.

852

### 853 **Genome assemblies and comparison**

854 Illumina and Oxford Nanopore reads were first mapped to *D. melanogaster* genome  
855 (BioProject: PRJNA13812) using BWA mem v0.7.12-r1039 [48] and minimap2 v2.17-r941  
856 [49], respectively. Reads mapping *D. melanogaster* genome were removed from the  
857 datasets before proceeding with *Wolbachia* genome assembly. We used Unicycler v0.4.8-  
858 beta [50] assembly pipeline on the remaining reads in order to assemble the *Wolbachia*  
859 genomes. Briefly, Unicycler uses Illumina reads to produce a repeats-limited image graph  
860 using Spades v3.9.0 [51], which was further refined through Bandage v0.8.1 [52]. Both  
861 small short nodes and nodes with no homology with *wMel* genome (AE017196.1) upon  
862 blastn v2.8.1+ [53] search were removed. Next, repeats were resolved by bridging Spades  
863 assemblies with Oxford Nanopore long reads. The resulting draft assemblies were  
864 polished using Racon v1.3.1 [54] and Pilon v1.23 [55] and rotated so that genomes begin  
865 at the *dnaA* gene (draft 1 genomes, not published).

866 We further refined our genome assemblies by mapping the Illumina reads to the  
867 corresponded draft genomes to identify mismatches, which were later corrected via  
868 Sanger sequencing (draft 2 genomes, not published). Primers used are in S9 Table.

869 Next, we compared the draft 2 genome assemblies by aligning *wMelPop*, *wMelCS\_b*,  
870 *wMelPop2*, and *wMelOctoless* using Mauve v2.4.0 [56]. The differences between these  
871 genomes could correspond to differences between *Wolbachia* variants or still genome  
872 assembly artefacts. All detected differences were analysed by Sanger sequencing (primers  
873 in S9 Table). There were no confirmed SNPs or small indels between *wMelCS\_b*,  
874 *wMelPop2*, and *wMelOctoless*. However, we identified and confirmed using Sanger  
875 sequencing two predicted SNPs between *wMelPop* and the other *Wolbachia* variants. The  
876 genomes were corrected with the Sanger sequencing information and published  
877 (BioProject: PRJNA587443).

878 We further tried to identify mutations in the over-proliferative variants following a previously  
879 published pipeline [57]. It consisted of mapping quality checked reads to a reference  
880 genome using BWA mem v0.7.12-r1039 algorithm [48] and saving the output as Sequence  
881 Alignment/Map file format (SAM). After conversion to the Binary Alignment/Map format  
882 (BAM), the file was sorted, duplicates removed and indexed using SAMtools v0.1.19 [58].  
883 Next, we generate mpileup files, also using SAMtools (option '-d 1,000,000'), after which  
884 was converted to Variant Call Format (VCF) files using BCFtools v1.9-209. We visually  
885 confirmed all inferred mutations in IGV v2.4.2 [59]. We did not consider mutations  
886 associated with homopolymer regions or in regions with low coverage (<10X). The set of  
887 mutations were compared between *Wolbachia* variants using custom Python and R  
888 scripts. The only difference we detected between these genomes was higher coverage or  
889 deletion of Octomom region.

890 To compare the set of mutations in the mitochondria of flies infected with different  
891 *Wolbachia* variant, we mapped Illumina reads to the *D. melanogaster* Release 6 genome  
892 sequence (KJ947872.2:1–14,000) and proceed as previously. Mutations following the  
893 criteria previously described were also compared by using custom scripts.

894

## 895 **Statistical analysis**

896 All the statistical comparisons were performed in R v4.0.0 [60].

897 To compare *Wolbachia* titres across multiple groups, we used linear models (LM) or linear  
898 mixed models (LMM). The effect of EMS on *Wolbachia* titre was tested using non-linear  
899 regression. We estimated the doubling time of *Wolbachia* variants using the equation  
900  $\log(2)/\beta$ , with  $\beta$  being the coefficients of an exponential model.

901 The lifespan datasets and survival curves after challenge with DCV were analysed with  
902 mixed effect Cox models [61].

903 The significance of correlations were tested using Pearson's correlation coefficient.

904 If multiple comparisons were necessary, the p-values were adjusted as proposed by Holm  
905 [62]. When multivariate techniques were applied, all the relevant covariates were included  
906 in the model, and the final model was selected as proposed by Burnham & Anderson [63].

907 All statistical analysis and supporting data is deposited in  
908 <https://doi.org/10.6084/m9.figshare.14079920.v1> [64].

909

## 910 **Acknowledgments**

911 We are thankful to the Bioinformatics Unit and the Genomics Facility at the Instituto  
912 Gulbenkian de Ciência for the support in the sequencing and assembly of the *Wolbachia*  
913 genomes. We are thankful to the Fly Facility at Instituto Gulbenkian de Ciência for support  
914 to the *Drosophila* work.

915

## 916 **Funding**

917 This work was funded by the Fundação para a Ciência e Tecnologia grant IF/00839/2015,  
918 and the European Research Council grant 773260.

919 E.H.D. was funded with the fellowship SFRH/BD/113757/2015 from Fundação para a  
920 Ciência e Tecnologia, in the context of the Graduate Program Science for the  
921 Development.

922 The fly work at the Fly Facility of Instituto Gulbenkian de Ciencia (Oeiras, Portugal), was  
923 partially supported by the research infrastructure Congento, co-financed by Lisboa  
924 Regional Operational Programme (Lisboa2020), under the PORTUGAL 2020 Partnership  
925 Agreement, through the European Regional Development Fund (ERDF) and Fundação  
926 para a Ciência e Tecnologia (Portugal) under the project LISBOA-01-0145-FEDER-  
927 022170.

928 The NGS analysis at the Genomics Unit of Instituto Gulbenkian de Ciencia (Oeiras,  
929 Portugal), was partially supported by ONEIDA project (LISBOA-01-0145-FEDER-016417)  
930 co-funded by FEEI - "Fundos Europeus Estruturais e de Investimento" from "Programa  
931 Operacional Regional Lisboa 2020" and by national funds from FCT - "Fundação para a  
932 Ciência e a Tecnologia."



933

## 934 **References**

- 935 1. Moran NA, McCutcheon JP, Nakabachi A. Genomics and Evolution of Heritable  
936 Bacterial Symbionts. *Annu Rev Genet.* 2008;42: 165–190.  
937 doi:10.1146/annurev.genet.41.110306.130119
- 938 2. Jaenike J. Coupled population dynamics of endosymbionts within and between hosts.  
939 *Oikos.* 2009;118: 353–362.
- 940 3. López-Madrigal S, Duarte EH. Titer regulation in arthropod-Wolbachia symbioses.  
941 *FEMS Microbiol Lett.* 2019;366: 118–9. doi:10.1093/femsle/fnz232
- 942 4. Zug R, Hammerstein P. Still a host of hosts for wolbachia: analysis of recent data  
943 suggests that 40% of terrestrial arthropod species are infected. *PLoS ONE.* 2012;7:  
944 e38544. doi:10.1371/journal.pone.0038544
- 945 5. Werren JH, Baldo L, Clark ME. Wolbachia: master manipulators of invertebrate  
946 biology. *Nat Rev Microbiol.* 2008;6: 741–751. doi:10.1038/nrmicro1969
- 947 6. Hosokawa T, Koga R, Kikuchi Y, Meng X-Y, Fukatsu T. Wolbachia as a bacteriocyte-  
948 associated nutritional mutualist. *Proc Natl Acad Sci U S A.* 2010;107: 769–774.  
949 doi:10.1073/pnas.0911476107
- 950 7. Hedges LM, Brownlie JC, O'Neill SL, Johnson KN. Wolbachia and virus protection in  
951 insects. *Science.* 2008;322: 702. doi:10.1126/science.1162418
- 952 8. Teixeira L, Ferreira A, Ashburner M. The bacterial symbiont Wolbachia induces  
953 resistance to RNA viral infections in *Drosophila melanogaster*. *PLoS Biol.* 2008;6:  
954 e1000002. doi:10.1371/journal.pbio.1000002
- 955 9. Ross PA, Turelli M, Hoffmann AA. Evolutionary Ecology of Wolbachia Releases for  
956 Disease Control. *Annu Rev Genet.* 2019;53: 93–116. doi:10.1146/annurev-genet-  
957 112618-043609
- 958 10. Aliota MT, Walker EC, Yepes AU, Velez ID, Christensen BM, Osorio JE. The w Mel  
959 Strain of Wolbachia Reduces Transmission of Chikungunya Virus in *Aedes aegypti*.  
960 *PLoS Negl Trop Dis.* 2016;10: e0004677. doi:10.1371/journal.pntd.0004677
- 961 11. Dutra HLC, Rocha MN, Dias FBS, Mansur SB, Caragata EP, Moreira LA. Wolbachia  
962 Blocks Currently Circulating Zika Virus Isolates in Brazilian *Aedes aegypti*  
963 Mosquitoes. *Cell Host Microbe.* 2016. doi:10.1016/j.chom.2016.04.021
- 964 12. Moreira LA, Iturbe-Ormaetxe I, Jeffery JA, Lu G, Pyke AT, Hedges LM, et al. A  
965 Wolbachia symbiont in *Aedes aegypti* limits infection with dengue, Chikungunya, and  
966 *Plasmodium*. *Cell.* 2009;139: 1268–1278. doi:10.1016/j.cell.2009.11.042
- 967 13. van den Hurk AF, Hall-Mendelin S, Pyke AT, Frentiu FD, McElroy K, Day A, et al.  
968 Impact of Wolbachia on Infection with Chikungunya and Yellow Fever Viruses in the  
969 Mosquito Vector *Aedes aegypti*. *PLoS Negl Trop Dis.* 2012;6: e1892.  
970 doi:10.1371/journal.pntd.0001892

- 971 14. Nazni WA, Hoffmann AA, NoorAfizah A, Cheong YL, Mancini MV, Golding N, et al.  
972 Establishment of *Wolbachia* Strain wAlbB in Malaysian Populations of *Aedes aegypti*  
973 for Dengue Control. *Curr Biol.* 2019;29: 4241-4248.e5. doi:10.1016/j.cub.2019.11.007
- 974 15. O'Neill SL, Ryan PA, Turley AP, Wilson G, Retzki K, Iturbe-Ormaetxe I, et al. Scaled  
975 deployment of *Wolbachia* to protect the community from *Aedes* transmitted  
976 arboviruses. *Gates Open Res.* 2018;2: 36. doi:10.12688/gatesopenres.12844.1
- 977 16. Chrostek E, Marialva MSP, Esteves SS, Weinert LA, Martinez J, Jiggins FM, et al.  
978 *Wolbachia* Variants Induce Differential Protection to Viruses in *Drosophila*  
979 *melanogaster*: A Phenotypic and Phylogenomic Analysis. *PLoS Genet.* 2013;9:  
980 e1003896. doi:10.1371/journal.pgen.1003896
- 981 17. Chrostek E, Teixeira L. Mutualism breakdown by amplification of *Wolbachia* genes.  
982 *PLOS Biol.* 2015;13: e1002065. doi:10.1371/journal.pbio.1002065
- 983 18. Lu P, Bian G, Pan X, Xi Z. *Wolbachia* Induces Density-Dependent Inhibition to Dengue  
984 Virus in Mosquito Cells. *PLoS Negl Trop Dis.* 2012;6: e1754.  
985 doi:10.1371/journal.pntd.0001754
- 986 19. Osborne SE, Leong YS, O'Neill SL, Johnson KN. Variation in antiviral protection  
987 mediated by different *Wolbachia* strains in *Drosophila simulans*. *PLoS Pathog.*  
988 2009;5: e1000656. doi:10.1371/journal.ppat.1000656
- 989 20. Osborne SE, Iturbe-Ormaetxe I, Brownlie JC, O'Neill SL, Johnson KN. Antiviral  
990 protection and the importance of *Wolbachia* density and tissue tropism in *Drosophila*  
991 *simulans*. *Appl Environ Microbiol.* 2012;78: 6922–6929. doi:10.1128/AEM.01727-12
- 992 21. McMeniman CJ, Lane RV, Cass BN, Fong AWC, Sidhu M, Wang Y-F, et al. Stable  
993 Introduction of a Life-Shortening *Wolbachia* Infection into the Mosquito *Aedes aegypti*.  
994 *Science.* 2009;323: 141–144. doi:10.1126/science.1165326
- 995 22. Min KT, Benzer S. *Wolbachia*, normally a symbiont of *Drosophila*, can be virulent,  
996 causing degeneration and early death. *Proc Natl Acad Sci U S A.* 1997;94: 10792–  
997 10796.
- 998 23. McClure EE, Chávez ASO, Shaw DK, Carlyon JA, Ganta RR, Noh SM, et al.  
999 Engineering of obligate intracellular bacteria: progress, challenges and paradigms.  
1000 *Nat Rev Microbiol.* 2017;984: 249. doi:10.1038/nrmicro.2017.59
- 1001 24. Ashburner M, Golic KG, Hawley RS. *Drosophila*□: a laboratory handbook. Cold Spring  
1002 Harbor, N.Y.□: Cold Spring Harbor Laboratory Press; 2005. Available:  
1003 <http://lccn.loc.gov/2004019474>
- 1004 25. Woolfit M, Iturbe-Ormaetxe I, Brownlie JC, Walker T, Riegler M, Seleznev A, et al.  
1005 Genomic evolution of the pathogenic *Wolbachia* strain, wMelPop. *Genome Biol Evol.*  
1006 2013;5: 2189–2204. doi:10.1093/gbe/evt169
- 1007 26. Wu M, Sun LV, Vamathevan J, Riegler M, Deboy R, Brownlie JC, et al.  
1008 Phylogenomics of the reproductive parasite *Wolbachia pipientis* wMel: a streamlined  
1009 genome overrun by mobile genetic elements. *PLoS Biol.* 2004;2: E69.  
1010 doi:10.1371/journal.pbio.0020069

- 1011 27. Basting PJ, Bergman CM. Complete Genome Assemblies for Three Variants of the  
1012 Wolbachia Endosymbiont of *Drosophila melanogaster*. *Microbiol Res Announc*.  
1013 2019;8: 741.
- 1014 28. Chrostek E, Teixeira L. Comment on Rohrscheib et al. 2016 “Intensity of mutualism  
1015 breakdown is determined by temperature not amplification of Wolbachia genes.” *PLoS*  
1016 *Pathog*. 2017;13: e1006540. doi:10.1371/journal.ppat.1006540
- 1017 29. Christensen S, Camacho M, Sharmin Z, Momtaz AJMZ, Perez L, Navarro G, et al.  
1018 Quantitative methods for assessing local and bodywide contributions to Wolbachia  
1019 titer in maternal germline cells of *Drosophila*. *BMC Microbiol*. 2019;19: 1–17.  
1020 doi:10.1186/s12866-019-1579-3
- 1021 30. McGarry HF, Egerton GL, Taylor MJ. Population dynamics of Wolbachia bacterial  
1022 endosymbionts in *Brugia malayi*. *Mol Biochem Parasitol*. 2004;135: 57–67.  
1023 doi:10.1016/j.molbiopara.2004.01.006
- 1024 31. Chrostek E, Teixeira L. Within host selection for faster replicating bacterial symbionts.  
1025 *PLoS ONE*. 2018;13: e0191530. doi:10.1371/journal.pone.0191530
- 1026 32. Sega GA. A review of the genetic effects of ethyl methanesulfonate. *Mutat Res*.  
1027 1984;134: 113–142.
- 1028 33. Grobler Y, Yun CY, Kahler DJ, Bergman CM, Lee H, Oliver B, et al. Whole genome  
1029 screen reveals a novel relationship between Wolbachia levels and *Drosophila* host  
1030 translation. *PLoS Pathog*. 2018;14: e1007445. doi:10.1371/journal.ppat.1007445
- 1031 34. Burr B, Burr FA. Activation of Silent Transposable Elements. *Plant Transposable*  
1032 *Elements*. Boston, MA: Springer US; 1988. pp. 317–323.
- 1033 35. Duchek P, Rørth P. Guidance of Cell Migration by EGF Receptor Signaling During  
1034 *Drosophila* Oogenesis. *Science*. 2001;291: 131–133.  
1035 doi:10.1126/science.291.5501.131
- 1036 36. Prelich G. Gene overexpression: uses, mechanisms, and interpretation. *Genetics*.  
1037 2012;190: 841–854. doi:10.1534/genetics.111.136911
- 1038 37. Iturbe-Ormaetxe I, Burke GR, Riegler M, O’Neill SL. Distribution, expression, and  
1039 motif variability of ankyrin domain genes in *Wolbachia pipientis*. *J Bacteriol*. 2005;187:  
1040 5136–5145. doi:10.1128/JB.187.15.5136-5145.2005
- 1041 38. Hill T, Unckless RL, Perlmutter JI. Rapid evolution and horizontal gene transfer in the  
1042 genome of a male-killing *Wolbachia*. *bioRxiv*. 2020; 2020.11.16.385294.
- 1043 39. Richardson MF, Weinert LA, Welch JJ, Linheiro RS, Magwire MM, Jiggins FM, et al.  
1044 Population Genomics of the Wolbachia Endosymbiont in *Drosophila melanogaster*.  
1045 *PLoS Genet*. 2012;8: e1003129. doi:10.1371/journal.pgen.1003129
- 1046 40. Reynolds KT, Thomson LJ, Hoffmann AA. The effects of host age, host nuclear  
1047 background and temperature on phenotypic effects of the virulent *Wolbachia* strain  
1048 popcorn in *Drosophila melanogaster*. *Genetics*. 2003;164: 1027–1034.
- 1049 41. Rohrscheib CE, Frentiu FD, Horn E, Ritchie FK, van Swinderen B, Weible MW, et al.  
1050 Intensity of Mutualism Breakdown Is Determined by Temperature Not Amplification of

- 1051 Wolbachia Genes. *PLoS Pathog.* 2016;12: e1005888.  
1052 doi:10.1371/journal.ppat.1005888
- 1053 42. Chrostek E, Martins NE, Marialva MS, Teixeira L. Wolbachia-conferred antiviral  
1054 protection is determined by developmental temperature. *bioRxiv.* 2020;  
1055 2020.06.24.169169. doi:10.1101/2020.06.24.169169
- 1056 43. Ryder E, Blows F, Ashburner M, Bautista-Llacer R, Coulson D, Drummond J, et al.  
1057 The DrosDel collection: a set of P-element insertions for generating custom  
1058 chromosomal aberrations in *Drosophila melanogaster*. *Genetics.* 2004;167: 797–813.  
1059 doi:10.1534/genetics.104.026658
- 1060 44. Pais IS, Valente RS, Sporniak M, Teixeira L. *Drosophila melanogaster* establishes a  
1061 species-specific mutualistic interaction with stable gut-colonizing bacteria. *PLOS Biol.*  
1062 2018;16: e2005710. doi:10.1371/journal.pbio.2005710
- 1063 45. Pfaffl MW. A new mathematical model for relative quantification in real-time RT-PCR.  
1064 *Nucleic Acids Res.* 2001;29: e45.
- 1065 46. Andrews, Simon. FastQC: A quality control tool for high throughput sequence data.  
1066 2010. Available: <https://www.bioinformatics.babraham.ac.uk/projects/fastqc/>
- 1067 47. Bolger AM, Lohse M, Usadel B. Trimmomatic: a flexible trimmer for Illumina sequence  
1068 data. *Bioinformatics.* 2014;30: 2114–2120. doi:10.1093/bioinformatics/btu170
- 1069 48. Li H, Durbin R. Fast and accurate short read alignment with Burrows-Wheeler  
1070 transform. *Bioinformatics.* 2009;25: 1754–1760. doi:10.1093/bioinformatics/btp324
- 1071 49. Li H. Minimap2: pairwise alignment for nucleotide sequences. Birol I, editor.  
1072 *Bioinformatics.* 2018;34: 3094–3100. doi:10.1093/bioinformatics/bty191
- 1073 50. Wick RR, Judd LM, Gorrie CL, Holt KE. Unicycler: resolving bacterial genome  
1074 assemblies from short and long sequencing reads. *bioRxiv.* 2016; 096412.  
1075 doi:10.1101/096412
- 1076 51. Bankevich A, Nurk S, Antipov D, Gurevich AA, Dvorkin M, Kulikov AS, et al. SPAdes:  
1077 A New Genome Assembly Algorithm and Its Applications to Single-Cell Sequencing. *J*  
1078 *Comput Biol.* 2012;19: 455–477. doi:10.1089/cmb.2012.0021
- 1079 52. Wick RR, Schultz MB, Zobel J, Holt KE. Bandage: interactive visualization of de novo  
1080 genome assemblies. *Bioinformatics.* 2015;31: 3350–3352.  
1081 doi:10.1093/bioinformatics/btv383
- 1082 53. Altschul SF, Gish W, Miller W, Myers EW, Lipman DJ. Basic local alignment search  
1083 tool. *J Mol Biol.* 1990;215: 403–410.
- 1084 54. Vaser R, Sovic I, Nagarajan N, Sikic M. Fast and accurate de novo genome assembly  
1085 from long uncorrected reads. *Genome Res.* 2017;27: 737–746.
- 1086 55. Walker BJ, Abeel T, Shea T, Priest M, Abouelliel A, Sakthikumar S, et al. Pilon: An  
1087 Integrated Tool for Comprehensive Microbial Variant Detection and Genome  
1088 Assembly Improvement. *PLoS ONE.* 2014;9: e112963.

- 1089 56. Darling ACE, Mau B, Blattner FR, Perna NT. Mauve: multiple alignment of conserved  
1090 genomic sequence with rearrangements. *Genome Res.* 2004;14: 1394–1403.
- 1091 57. Li H. A statistical framework for SNP calling, mutation discovery, association mapping  
1092 and population genetical parameter estimation from sequencing data. *Bioinformatics.*  
1093 2011;27: 2987–2993. doi:10.1093/bioinformatics/btr509
- 1094 58. Li H, Handsaker B, Wysoker A, Fennell T, Ruan J, Homer N, et al. The Sequence  
1095 Alignment/Map format and SAMtools. *Bioinformatics.* 2009;25: 2078–2079.  
1096 doi:10.1093/bioinformatics/btp352
- 1097 59. Robinson JT, Thorvaldsdóttir H, Winckler W, Guttman M, Lander ES, Getz G, et al.  
1098 Integrative genomics viewer. *Nat Biotechnol.* 2011;29: 24–26.
- 1099 60. Team RC. R: A language and environment for statistical computing. R Foundation for  
1100 Statistical Computing, Vienna, Austria; 2012. Available: URL <http://www.R-project.org/>
- 1101 61. Therneau TM. *coxme: Mixed Effects Cox Models.* 2020. Available: [https://CRAN.R-](https://CRAN.R-project.org/package=coxme)  
1102 [project.org/package=coxme](https://CRAN.R-project.org/package=coxme)
- 1103 62. Holm S. A simple sequentially rejective multiple test procedure. *Scand J Stat.* 1979;6:  
1104 65–70.
- 1105 63. Burnham KP, Anderson DR. *Model selection and multimodel inference*: a practical  
1106 information-theoretic approach. New York: Springer; 2002.
- 1107 64. Duarte E, Carvalho A, López-Madrigal S, Costa J, Teixeira L. Data and analysis for  
1108 “Forward genetics in *Wolbachia*: Regulation of *Wolbachia* proliferation by the  
1109 amplification and deletion of an addictive genomic island.” figshare. Dataset.  
1110 <https://doi.org/10.6084/m9.figshare.14079920.v2>

1111

## 1112 **Supporting information**

### 1113 **S1 Fig. *Wolbachia* recovers from severe titre reduction within four fly generations.**

1114 Relative *Wolbachia* titres of the progeny of tetracycline-treated flies. *wMelCS\_b*-carrying females laid eggs in  
1115 food containing varying doses of tetracycline. The progeny of three females were used to set up the  
1116 experiment. At the first generation, four females were randomly selected for egg-laying in antibiotic-free fly  
1117 food and *Wolbachia* titre was measured using qPCR. Titres of untreated females were used to normalize the  
1118 qPCR results. The progeny of a female with the median titre was used to set up the next generation.  
1119 *Wolbachia* titre in the F1 was significantly determined by the concentration of the antibiotic ( $p < 0.001$  for all  
1120 doses compared with control at generation 1), but recovered to normal within four fly generations ( $p > 0.05$   
1121 for all doses compared with control at generation 4).

1122

### 1123 **S2 Fig. EMS decreases female fecundity and *Wolbachia* titre in the next generation in a dose-** 1124 **dependent manner.**

1125 The total number of eggs (A) and adults (B) from females treated with varying doses of EMS. The  
1126 reproductive output of 10 females was determined in the first ten days after EMS treatment by daily

1127 transferring females to new vials for egg laying. Females fed on a sucrose solution served as controls. Each  
1128 dot represents the total number of eggs (A) or adults (B) laid by individual females during ten days. The  
1129 effect of EMS on the reproductive output of females was estimated using a non-linear model and was highly  
1130 significant ( $p < 0.001$  for both numbers of eggs and adults per female). (C and D) *Wolbachia* titres in the F1  
1131 progeny of females treated with varying EMS doses. *Wolbachia* titre was quantified on individual females ( $n$   
1132 = 5–13 per dose), after laying eggs for three days. *Wolbachia* titres were normalized against the titres of  
1133 untreated females. Dashed red lines represent the mean value predicted using non-linear models. The effect  
1134 of EMS on *Wolbachia* titres in the next generation was highly significant ( $p < 0.001$  for both panels).

1135

### 1136 **S3 Fig. Isolation of over-proliferative *Wolbachia* variants.**

1137 (A-D) Relative *Wolbachia* titres in a control (*wMelCS\_b*) and EMS-treated *D. melanogaster* lines. Flies to set  
1138 up the next generation was selected as described for Fig 1. Line 2B was isolated in the same batch as Line  
1139 2A (*wMelOctoless*) and they may be not independent. Likewise, Lines 3A (*wMelOctoless2*), 3B, and 3C were  
1140 also isolated in a same batch.

1141

### 1142 **S4 Fig. Generation of isogenic *D. melanogaster* lines with *wMelPop2* and *wMelOctoless*.**

1143 The first, second and third chromosomes of flies carrying *wMelPop2*, *wMelOctoless*, and *wMelOctoless2*  
1144 were replaced through the use of balancer chromosomes. *Wolbachia* infection (and also mitochondria) was  
1145 kept in the stock by crossing females with *Wolbachia* with indicated males. The mitochondria are only shown  
1146 in females because of its strictly maternal transmission. All males were free of *Wolbachia* infection. Dashed  
1147 lines indicate the genotype selected from the previous cross. Virgin female in the first cross were considered  
1148 mutant in all chromosomes (\*), for illustrative purposes. Question marks (?) represent recombined  
1149 chromosomes.

1150

### 1151 **S5 Fig. Proliferation of *wMelOctoless* and *wMelOctoless2* in a host isogenic genetic background.**

1152 Relative *Wolbachia* titres in *D. melanogaster* males carrying *wMelOctoless* and *wMelOctoless2* at 0 and 7  
1153 days post adult eclosion, at 25°C. This experiment was set-up as described in Fig 1. Relative *Wolbachia* titre  
1154 was determined using qPCR and normalized to that of 0-1 days-old *wMelCS\_b*-infected males. Each dot  
1155 represents the relative titre of a single male.

1156

### 1157 **S6 Fig. Confirmation of amplification and deletion of Octomom genes by qPCR.**

1158 The amplification and deletion of individual Octomom genes (*wMel* loci *WD0507–WD0514*) was confirmed  
1159 using qPCR in *wMelPop2* and *wMelOctoless*, respectively. The copy number of three genes outside the  
1160 Octomom region (*wMel* loci *WD0505*, *WD0519*, and *rpoD*) were also determined. Five females carrying  
1161 *wMelCS\_b*, *wMelPop2*, and *wMelOctoless* were used in the analysis. The copy number of *wMelPop2* and  
1162 *wMelOctoless* genes is relative to that of *wMelCS\_b*.

1163

1164 **S7 Fig. Selection for lines carrying *Wolbachia* with a desired Octomom copy number.**

1165 The relative copy number of genomic *WD0513* in *Wolbachia*-carrying stocks throughout 30 fly generations.  
1166 Each generation, 5-20 females were randomly collected for egg-laying for 3-4 days and used to determine  
1167 the relative copy number of *WD0513*, as a proxy for the Octomom copy number. The progeny of a single  
1168 female was used to set up the next generation. qPCR results were normalized to that of *wMelCS\_b*, which  
1169 has a single copy of Octomom per genome.

1170

1171 **S8 Fig. Octomom region is amplified in tandem in *wMelPop2* and *wMelPop*.**

1172 Oxford Nanopore MinION reads supporting the amplification of the Octomom region in tandem in *wMelPop2*  
1173 and *wMelPop* *Wolbachia* variants. We mapped *wMelPop2* and *wMelPop* long reads (BioProject:  
1174 PRJNA587443) to the the Octomom region in their genomes (Accessions CP046922.1 and CP046921.1,  
1175 respectively) using minimap2 v2.17-r941 [48] and plotted the alignment summary (S7 Table) for illustrative  
1176 purposes.

1177

1178 **S9 Fig. Identification of the genetic bases for over-proliferation of the *Wolbachia* in Line 2B and Line  
1179 3A (*wMelOctoless2*).**

1180 Relative coverage in the genomic region containing the Octomom region. As in Fig 2B, Illumina paired-end  
1181 reads were mapped to *wMelCS\_b* (GenBank: CP046924.1) genome, and the number of reads mapping to  
1182 each position were normalized by dividing to the median coverage across the genome. Coverage information  
1183 for *wMelCS\_b*, *wMelPop2* and *wMelOctoless* is also given in Fig 2B. We identified the deletion of Octomom  
1184 as the cause of proliferation in lines 2B and line 3A (*wMelOctoless2*), as no other difference was found when  
1185 compared to *wMelCS\_b*.

1186

1187 **S10 Fig. The amplification or deletion of Octomom increase *Wolbachia* proliferation rate in adults.**

1188 Time-course of relative *Wolbachia* titres in adults at 18°C (A), 25°C (B) and 29°C (C) with different *Wolbachia*  
1189 variants. Replicate of experiment shown in Fig 3. *Wolbachia* titres were determined and analysed as  
1190 described for Fig 3.

1191

1192 **S11 Fig. Octomom copy number determines *Wolbachia* titres on the day of adult eclosion.**

1193 Relative *Wolbachia* titres on the day of adults eclosion. Males developed at 25°C were collected within 24  
1194 hours after eclosion for *Wolbachia* titre measurement using qPCR. Data used in this figure are also shown in  
1195 Fig 3 and S10 Fig (time point 0). Letters represent significant groups after *p*-value correction.

1196

1197 **S12 Fig. *wMelPop2* and *wMelPop* are phenotypically indistinguishable.**

1198 (A) *WD0513* copy number of *wMelPop2* and *wMelPop* in two experimental replicates. Using *WD0513* as a  
1199 proxy, the Octomom copy number of *wMelPop2* and *wMelPop* was tightly controlled prior to phenotypic  
1200 comparison. (B) *Wolbachia* relative titres at 25°C. The progeny of *wMelPop2*- and *wMelPop*-infected females

1201 carrying three copies of Octomom was used to set up the experiments. Males that developed at 25°C were  
1202 collected upon eclosion, aged to specific time-points and used to determine *Wolbachia* titres using qPCR.  
1203 *Wolbachia* titres were normalized to that of wMelCS\_b-carrying flies collected on the day of eclosion.  
1204 Proliferation rates of wMelPop2 and wMelPop were not different ( $p = 0.32$ ). (C) Lifespan of males (solid lines)  
1205 and females (dashed lines) flies at 25°C. Males were transferred to new vials every five days, while females  
1206 every four days. (D) Coefficients of a Cox mixed model, representing the effect of wMelPop2 and wMelPop  
1207 on the lifespan relative to wMelCS\_b-carrying flies. wMelPop2 and wMelPop was equally pathogenic ( $p =$   
1208 0.29).

1209

### 1210 **S13 Fig. Octomom copy number dynamics throughout fly development and during adult life.**

1211 Relative copies of *WD0513* throughout *D. melanogaster* development (A) and during adult life (B). *WD0513*  
1212 relative copy numbers were determined in samples shown in Fig 4 (for panel A) and Fig 3 and S10 Fig (for  
1213 panel B). *WD0513* copies were normalized to that of 0-1 old wMelCS\_b-infected males. (A) Vertical dashed  
1214 lines separate developmental stages (i.e. eggs, larvae, pupae, and adults). The x-axis is not in a continuous  
1215 scale. (B) The two replicates are represented by different symbols.

1216

### 1217 **S14 Fig. wMelPop2 and wMelOctoless are pathogenic to both males and females.**

1218 Lifespan of *D. melanogaster* males at 18°C (A), 25°C (B), and 29°C (C). Survivorship was determined as in  
1219 Fig 5. This is a replicate of Fig 5 (D) Survival of *D. melanogaster* females at 25°C. Survival was determined  
1220 as in Fig 5, except that females were transferred to new vials every four days. The experiment was  
1221 performed twice. (E) Coefficients of a Cox mixed model of the lifespan of females relative to *Wolbachia*-free  
1222 control. Both replicate experiments were pooled for statistical comparisons. Bars represent the standard error  
1223 of the coefficient, and letters the statistically significant groups.

1224

### 1225 **S15 Fig. *Wolbachia* variants, not differences in the host genetic background, are pathogenic.**

1226 (A-B) Survival of *D. melanogaster* females at 29°C. Virgin wMelCS\_b-carrying females were crossed with  
1227 males carrying wMelOctoless or wMelPop2 (with 3 or 8-9 Octomom copies) and vice-versa. The resulting  
1228 progeny developed at 25°C and was placed at 29°C after adult eclosion. The survival of 50 female progeny,  
1229 which have the same genetic background but differ in *Wolbachia* infection, was determined per condition, per  
1230 replicate. Females were maintained in groups of ten and transferred to new vial every four days. The  
1231 experiment was performed twice. (C) Coefficients of a Cox mixed model representing the effect of the  
1232 parental crosses on the survivorship of females. Significance was assessed after p-value correction for  
1233 multiple comparisons, and significant groups are represented by letters.

1234

### 1235 **S16 Fig. Correlation between *Wolbachia*-induced phenotypes and bacterial titres or doubling time.**

1236 (A-C) Correlation between *Wolbachia* titre at the day of eclosion and the strength of life-shortening  
1237 phenotype determined at 18°C (A), 25°C (B), and 29°C (C). The y-axis represents the strength of *Wolbachia*  
1238 life-shortening phenotype (estimated using Cox mixed model shown in Fig 5). The x-axis represents the



1239 natural log of the relative *Wolbachia* titre estimated using a linear mixed model. Bacterial titres were  
1240 normalized to that of *wMelCS\_b*-infected flies (shown in S11 Fig). (D and E) The correlation between the  
1241 strength of anti-viral protection and *Wolbachia* doubling time. The y-axis represents the strength of anti-viral  
1242 protection (estimated using Cox mixed model shown in Fig 6). The x-axis represents *Wolbachia* doubling  
1243 time in adults at 18°C (D), or 25°C (E) (shown in Table 1). The Pearson correlation coefficient (r) and its  
1244 significance (p) are given in each panel. A grey line represents the trend (fit of linear regression). Error bars  
1245 represent the standard errors of the estimates. None of these correlations were statistically significant and  
1246 they complement correlations shown in Fig 5 and Fig 6.

1247

1248 **S17 Fig. Survival of flies with different *Wolbachia* variants after challenge with DCV or buffer**  
1249 **solution.**

1250 (A) Survival of males carrying different *Wolbachia* variants after a challenge with DCV (A) or a buffer solution  
1251 (B and C). Fifty 3-5 days-old *Drosophila* males, per line, were pricked with DCV ( $10^9$  TCID<sub>50</sub>/ml) or buffer and  
1252 survival curves were determined at 18°C for 40 days. A is a replicate of Fig 6A, B and C are controls for  
1253 these experiments. (D) Coefficients of Cox mixed models of buffer-pricked flies. Both replicates were pooled  
1254 for statistical analysis. Bars represent the standard error of the estimate, and the letters the statistically  
1255 significant groups after p-value correction.

1256

1257 **S1 Table. Number of F1 females screened for new over-proliferative *Wolbachia* variants per**  
1258 **experimental condition.**

1259 *wMelCS\_b*-infected G0 females, raised in control or antibiotic-treated food (12.5 µg/ml), were fed different  
1260 doses of ethyl-methanesulfonate (EMS) and allowed to lay eggs in individual vials. F1 females were  
1261 collected as virgins, mated to non-mutagenized males and also allowed to lay eggs individually. F1 females  
1262 were used for *Wolbachia* titre measurement when were 10-days old. Number of F1 females tested per  
1263 experimental condition is shown.

1264

1265 **S2 Table. Coverage statistics of the sequencing project.**

1266 Coverage statistics (mean and range) of Illumina reads mapped to either *Wolbachia* or mitochondria of *D.*  
1267 *melanogaster* Release 6 genome sequence (KJ947872.2:1–14,000). Sequencing data of each *Wolbachia*  
1268 variants are mapped to own genome assembly (BioProject ID: PRJNA587443), except for *Wolbachia* in Line  
1269 2B and *wMelOctoless2* which were mapped to *wMelCS\_b* genome (Accession: CP046924.1). ND – not  
1270 determined.

1271

1272 **S3 Table. Flies infected with new over-proliferative *Wolbachia* variants did not inherit mutated**  
1273 **mitochondria.**

1274 Illumina reads on flies infected with different *Wolbachia* variants were mapped to the mitochondria of *D.*  
1275 *melanogaster* Release 6 genome sequence (KJ947872.2:1–14,000). A summary of the mapping is given in  
1276 S2 Table. The mitogenome of flies infected with *wMelCS\_b*, *wMelOctoless* and *wMelPop2* was identical. We

1277 found an SNP unique to flies infected with *wMelCS*-like variants (G→A on position 10,793) but absent in flies  
1278 infected with *wMelPop*. We confirmed this SNP using Sanger sequencing.

1279

1280 **S4 Table. Assembly and annotation statistics.**

1281 *Wolbachia* genomes were assembled using the Unicycler v0.4.8-beta pipeline and annotated using NCBI  
1282 Prokaryotic Genome Annotation Pipeline v4.10. *wMel* reference genome (Accession: AE017196.1) is  
1283 included for comparison purposes.

1284

1285 **S5 Table. SNPs and indels between newly assembled *wMel* and *wMel* reference genome.**

1286 The genome of a newly assembled Cluster III *wMel Wolbachia* variant (Accession: CP046925.1) was aligned  
1287 to *wMel* reference genome (Accession: AE017196.1) using Mauve v2.4.0. All the differences were confirmed  
1288 via Sanger sequencing.

1289

1290 **S6 Table. SNPs and indels between *wMelCS\_b* and *wMel* reference genome.**

1291 The genome of *wMelCS\_b* (Accession: CP046924.1) was aligned to *wMel* reference genome (Accession:  
1292 AE017196.1) using Mauve v2.4.0.

1293

1294 **S7 Table. Alignment summary of long reads supporting the amplification of the Octomom region in  
1295 tandem.**

1296 Long reads (MinION, Oxford Nanopore) reads supporting the amplification of the Octomom region in tandem  
1297 in *wMelPop2* (Accession: CP046922.1) and *wMelPop* (Accession: CP046921.1) genomes. Long reads were  
1298 mapped to Octomom region using minimap2 v2.17-r941 and the number of Octomom copies determined  
1299 using blastn v2.8.1+.

1300

1301 **S8 Table. Primers used for amplification and quantification of individual *Wolbachia* genes.**

1302 Primers used in this study have been previously described (Chrostek 2013 and Chrostek 2015).

1303

1304 **S9 Table. List of primers used to improve *Wolbachia* draft genomes.**

1305 Primers used to amplify and sequence, using Sanger technology, genomic regions containing predicted  
1306 differences between *Wolbachia* draft genomes.

1307

1308 **S1 Text. Confirmation of the amplification and deletion of the Octomom in *wMelPop2* and  
1309 *wMelOctoless*, respectively.**

1310 The genomes of *wMelCS\_b*, *wMelPop2* and *wMelOctoless* were aligned using Mauve v2.4.0. The three-fold  
1311 amplification of Octomom in *wMelPop2* and its deletion in *wMelOctoless* were the only difference identified  
1312 when compared with *wMelCS\_b*.

Relative *Wolbachia* titerTetracycline concentration ( $\mu\text{g/ml}$ )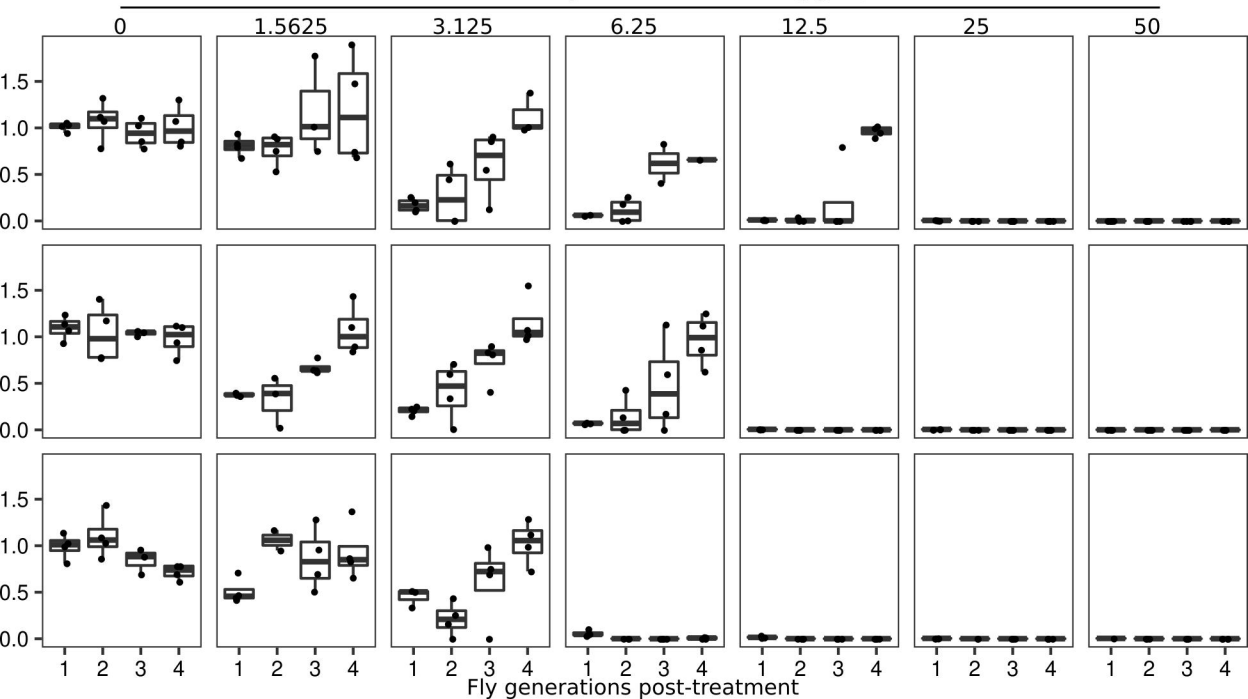

**A**

Total number of eggs

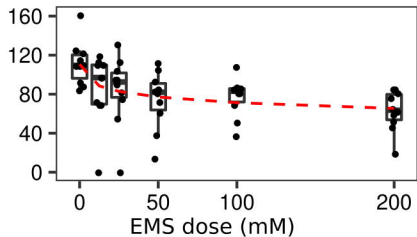**B**

Total number of adult progeny

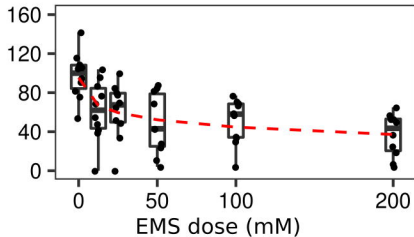**C**Relative *Wolbachia* titer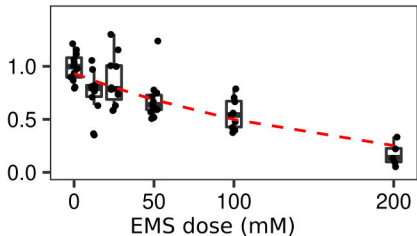**D**Relative *Wolbachia* titer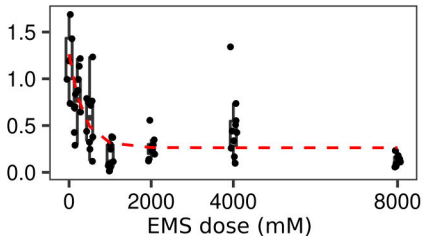

**A**  
Relative *Wolbachia* titers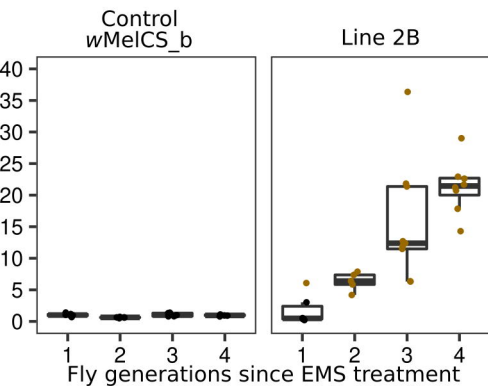**B**  
Relative *Wolbachia* titers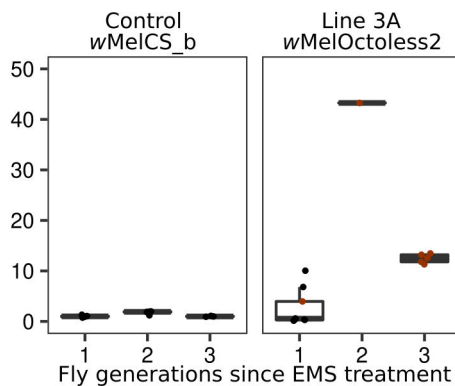**C**  
Relative *Wolbachia* titers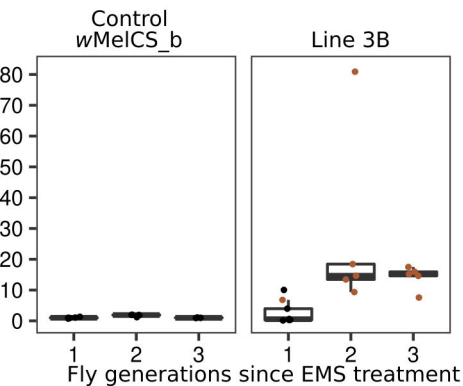**D**  
Relative *Wolbachia* titers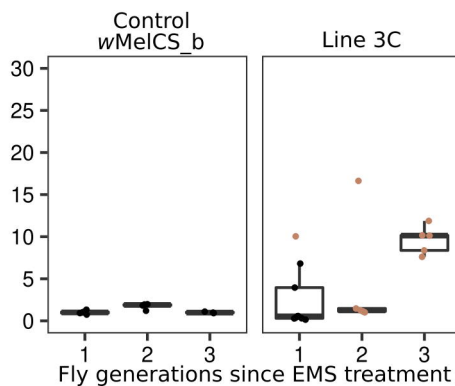

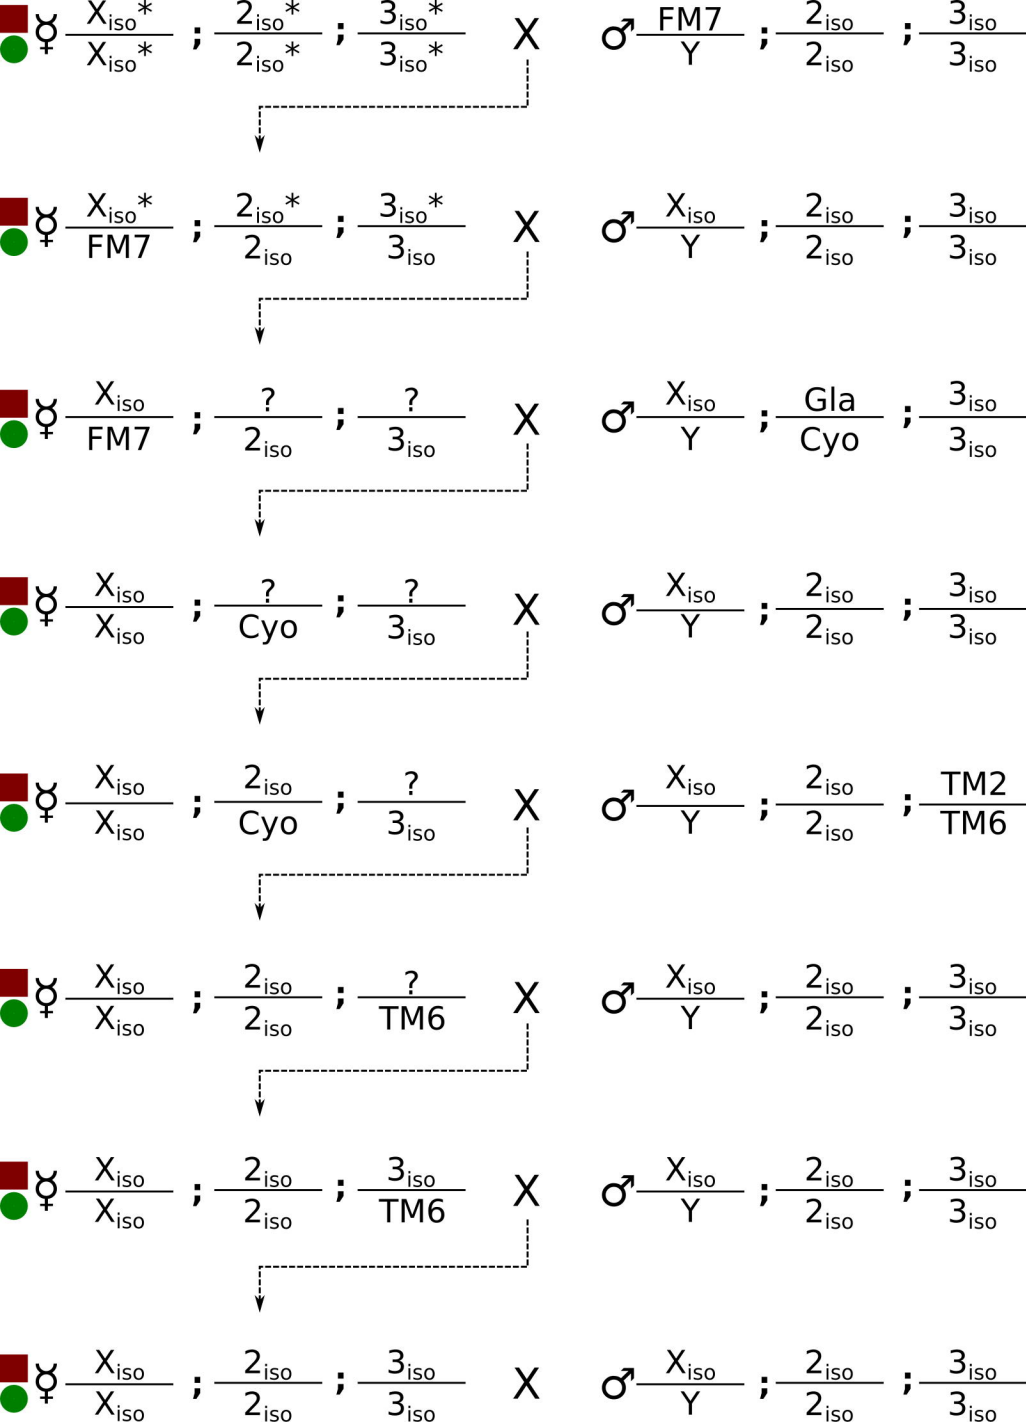

■ *Wolbachia*    ● Mitochondria

Relative *Wolbachia* titer at 25°C

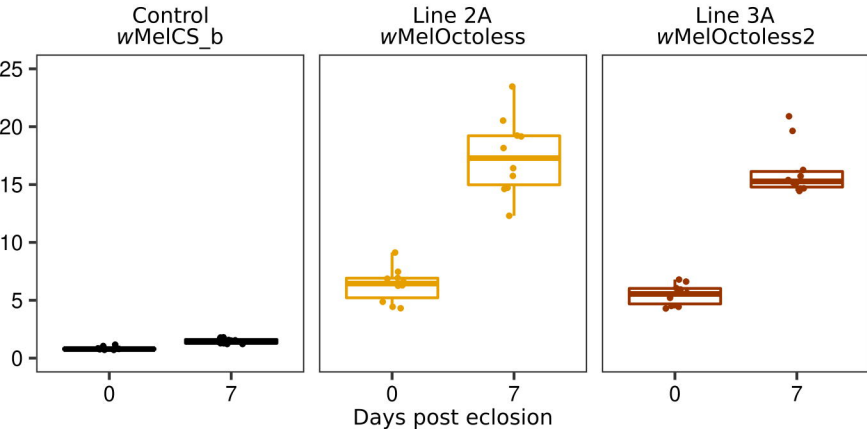

## Copy number of individual genes

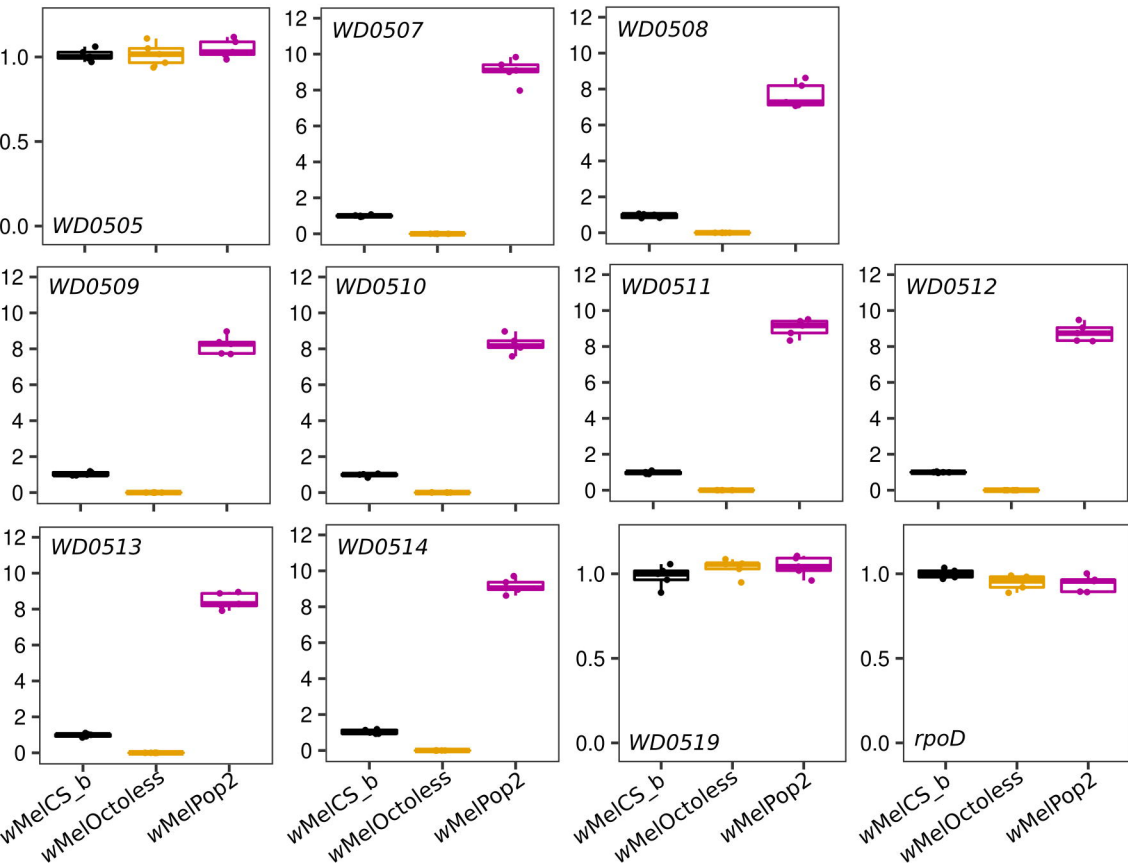



Relative copies of *WD0513*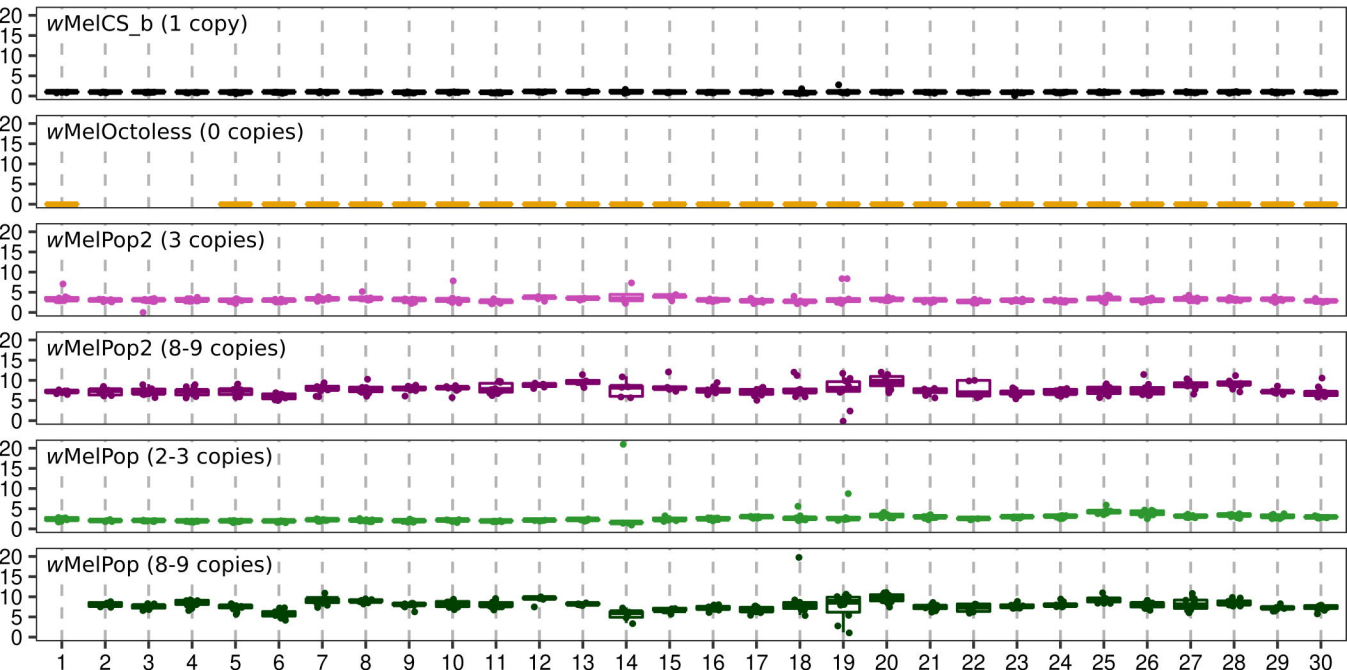

# wMelPop2

Reverse  
Forward

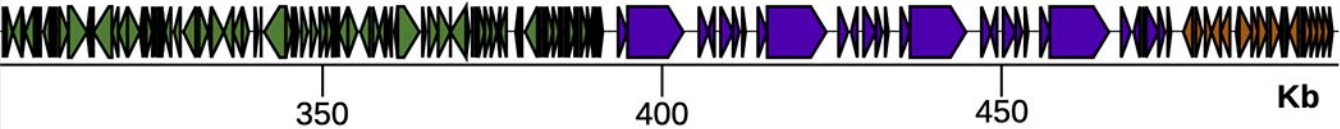

# wMelPop

Reverse  
Forward

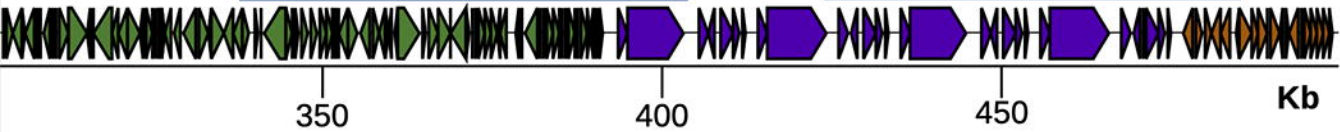

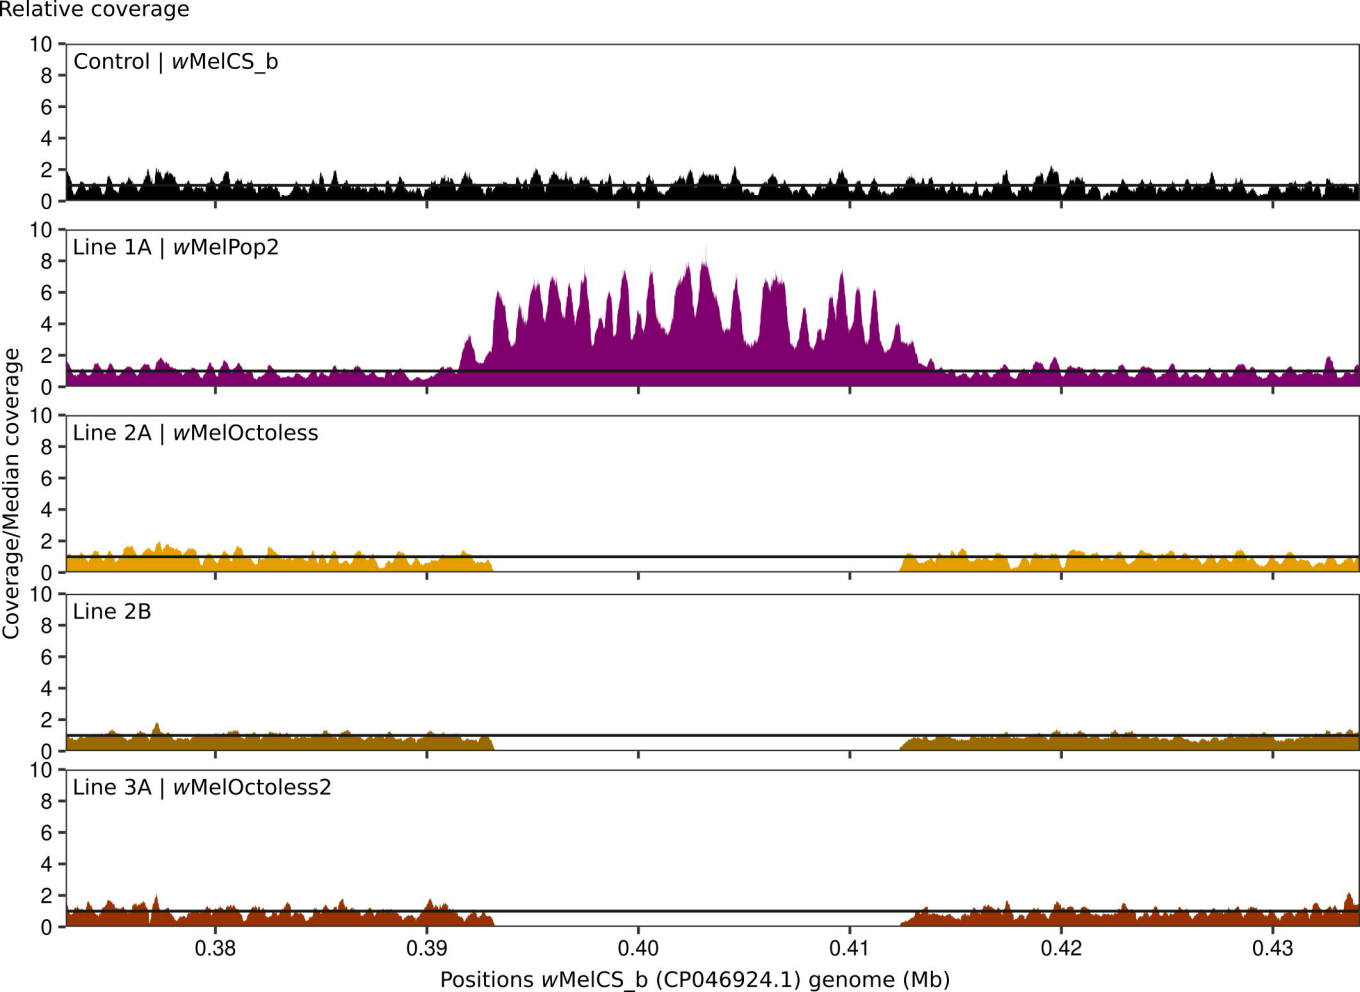

**A**  
Relative *Wolbachia* titer at 18°C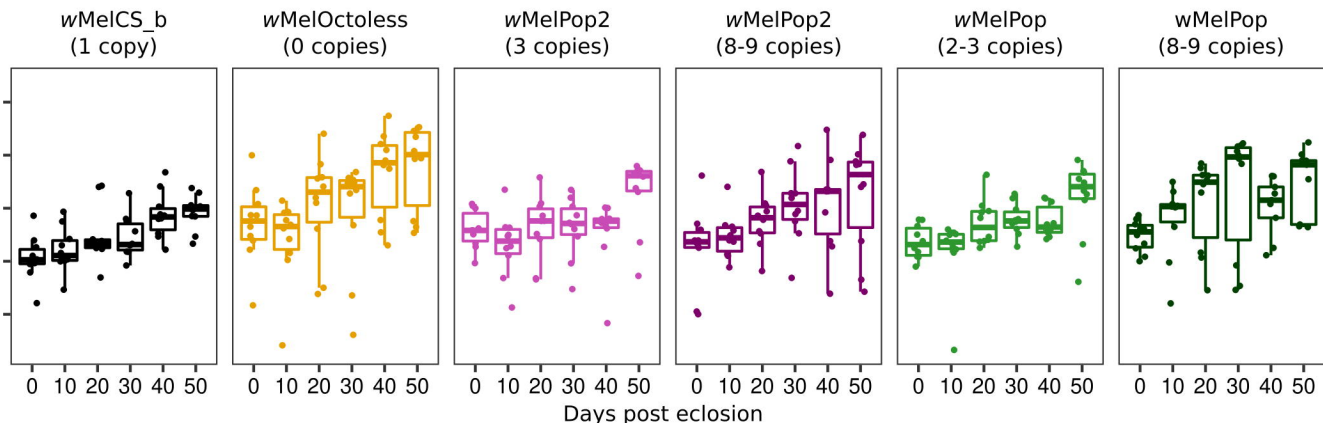**B**Relative *Wolbachia* titer at 25°C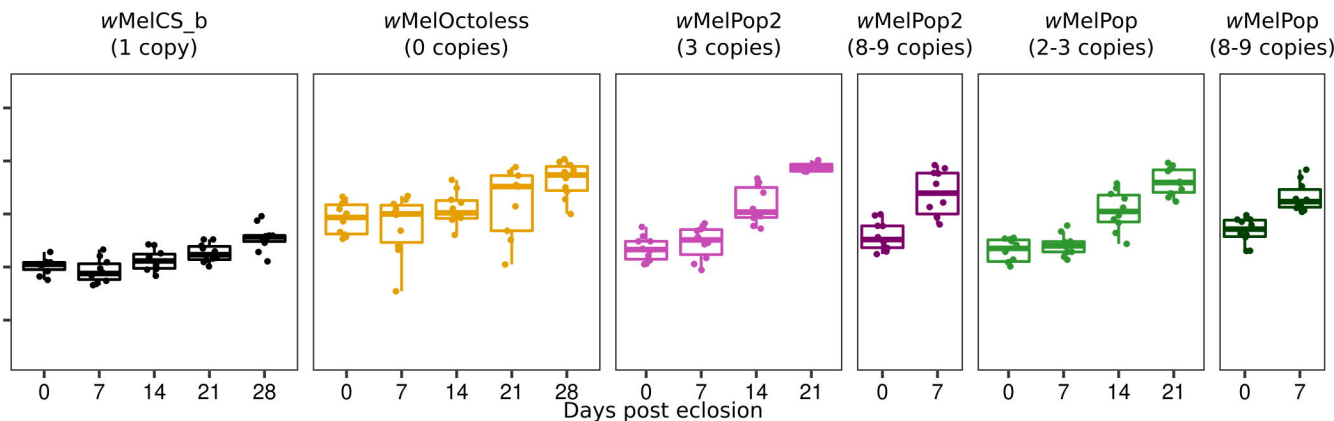**C**Relative *Wolbachia* titer at 29°C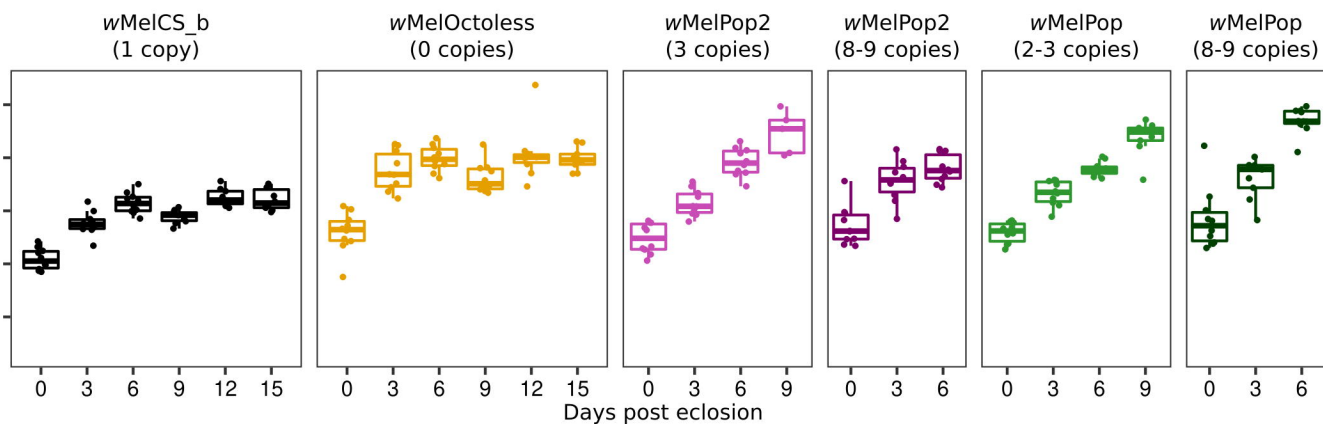

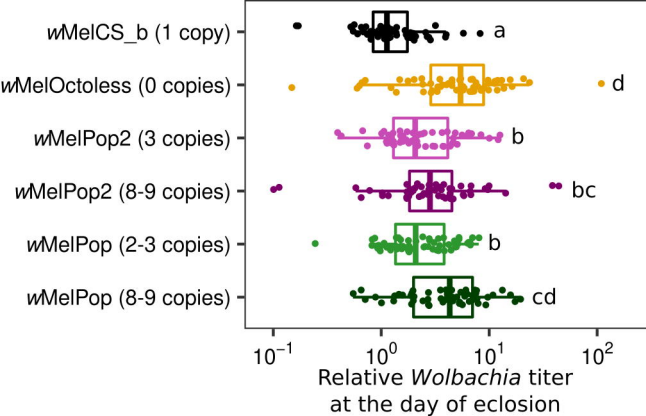

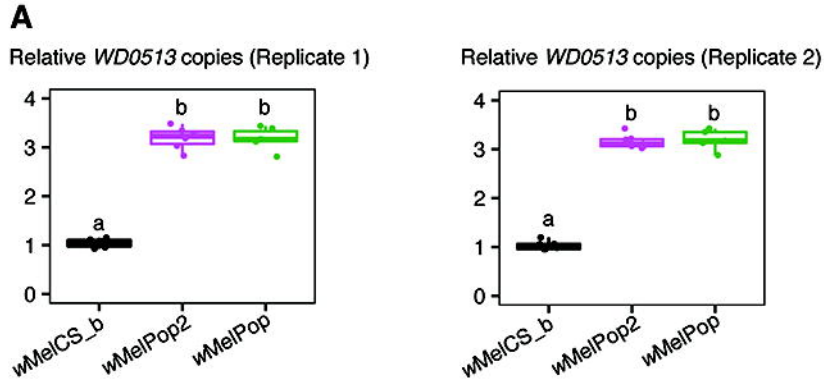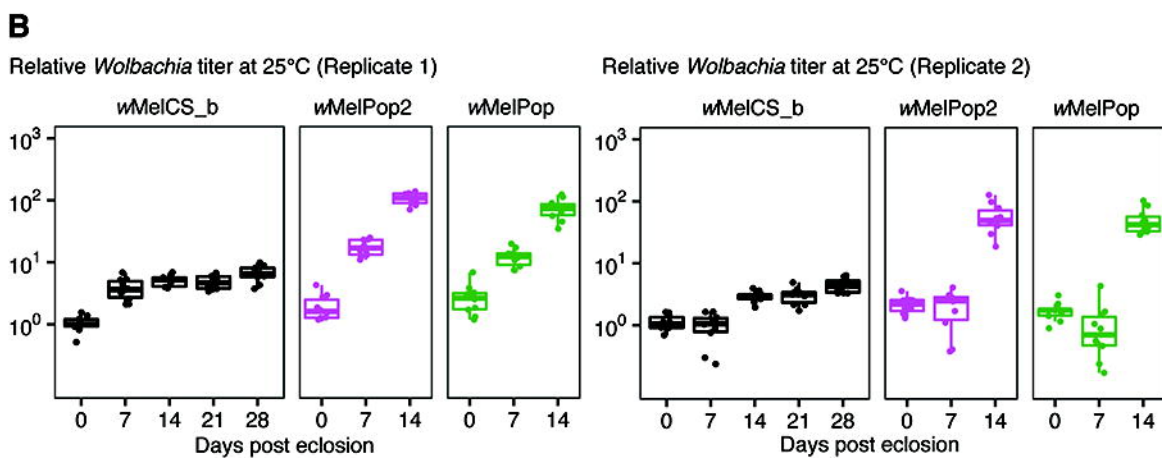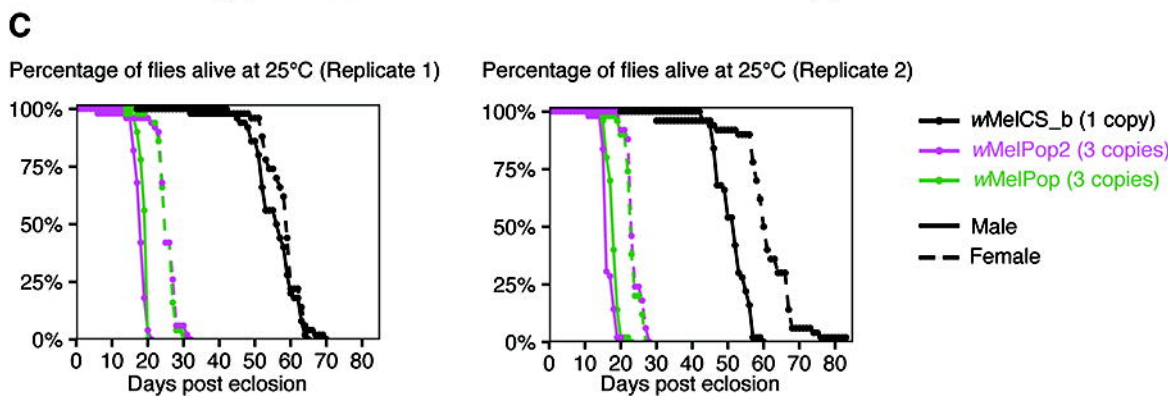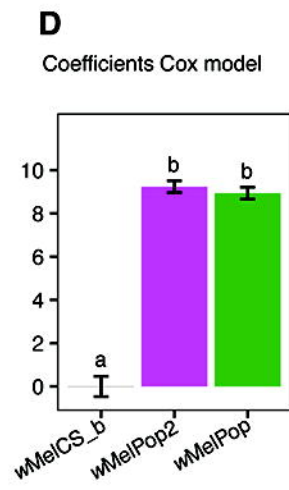

**A**Relative copies of *WD0513*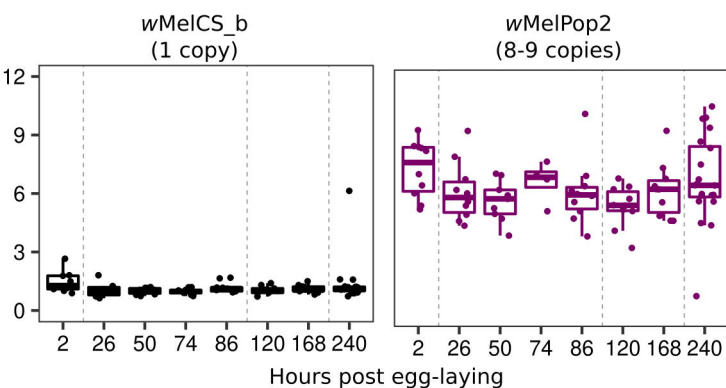**B**Relative copies of *WD0513* at 18°C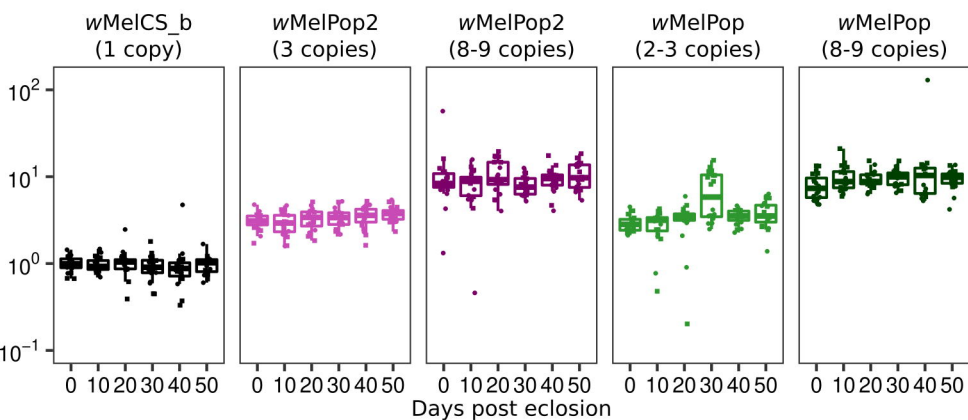Relative copies of *WD0513* at 25°C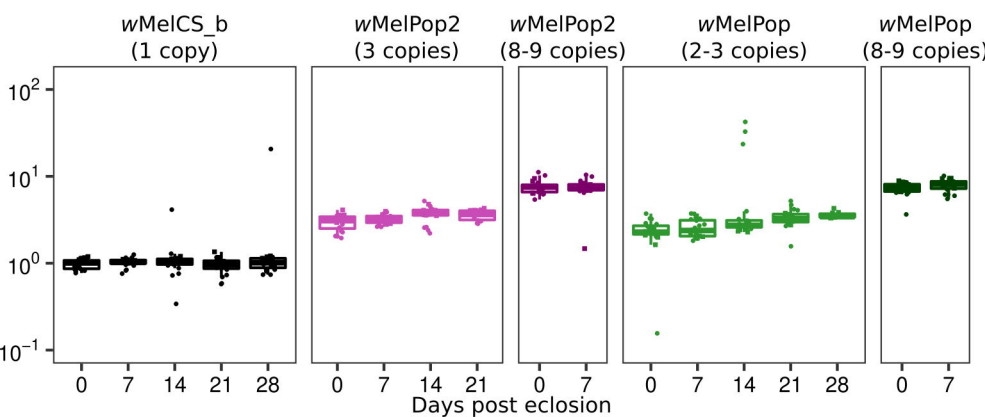Relative copies of *WD0513* at 29°C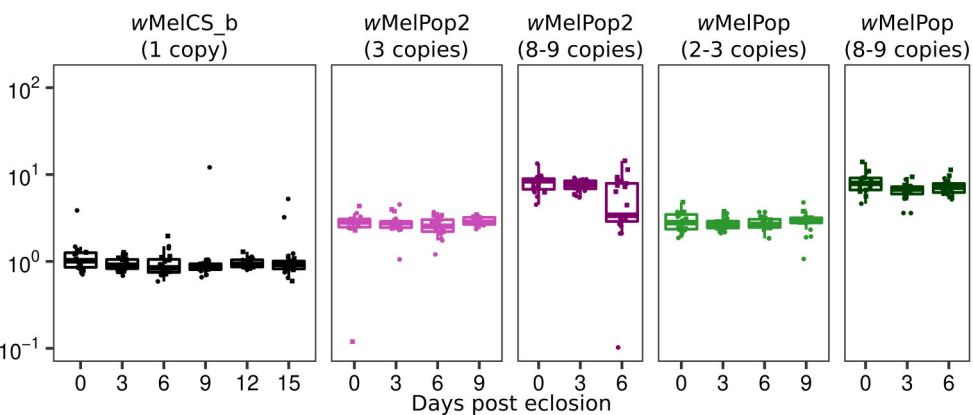

**A** Percentage of males alive at 18°C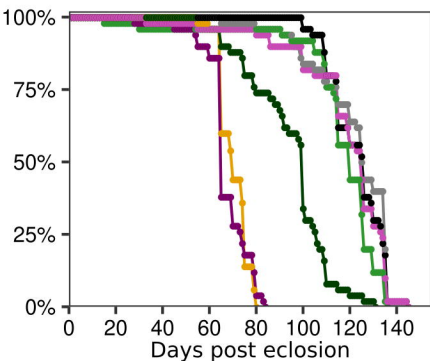**B** Percentage of males alive at 25°C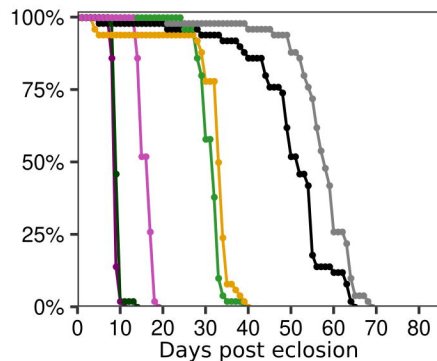**C** Percentage of males alive at 29°C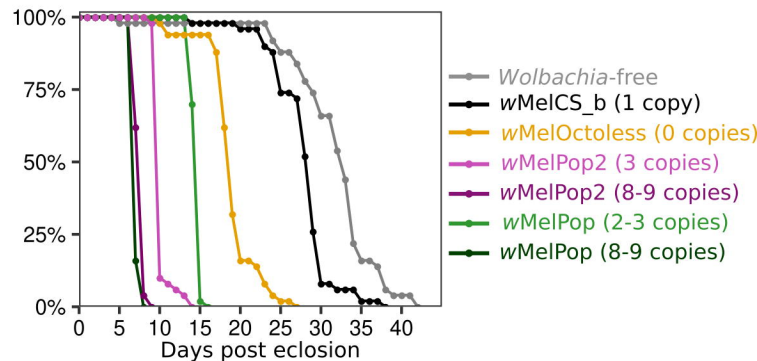**D** Percentage of females alive at 25°C  
Replicate 1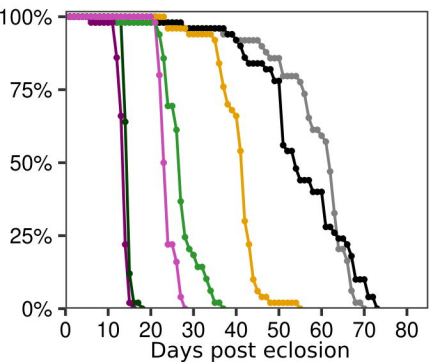Percentage of females alive at 25°C  
Replicate 2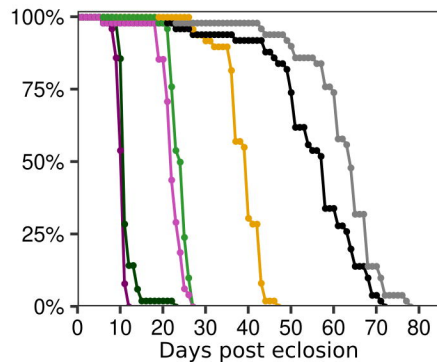**E** Coefficients of Cox mixed model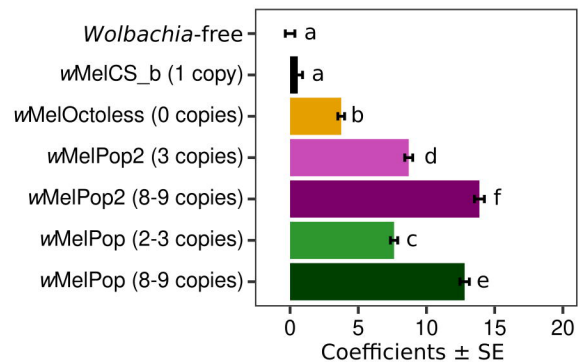



### A

Percentage of females alive at 29°C (Replicate 1)

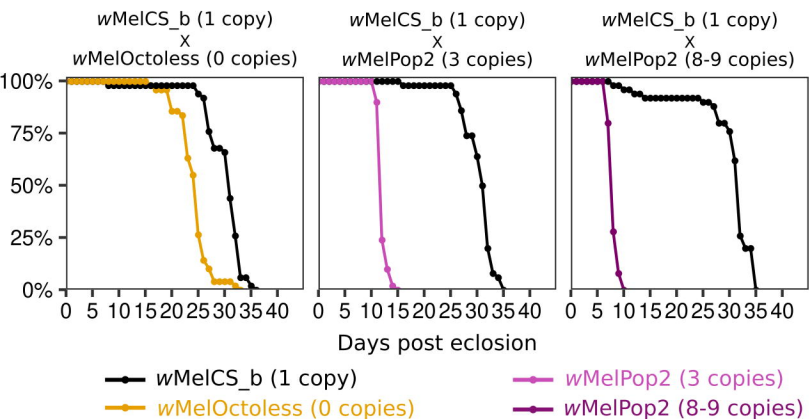

### B

Percentage of females alive at 29°C (Replicate 2)

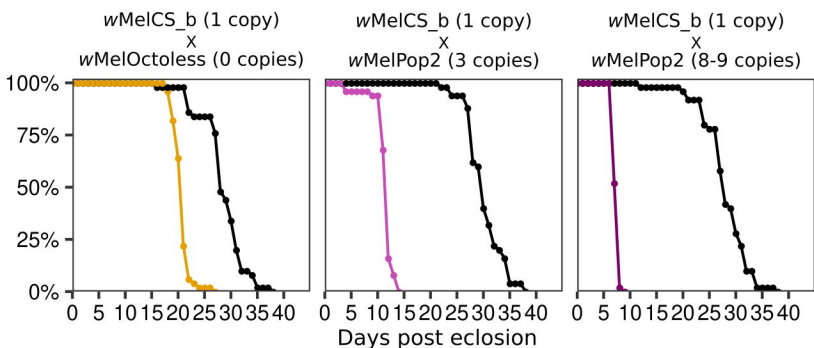

### C

Coefficients of Cox mixed model

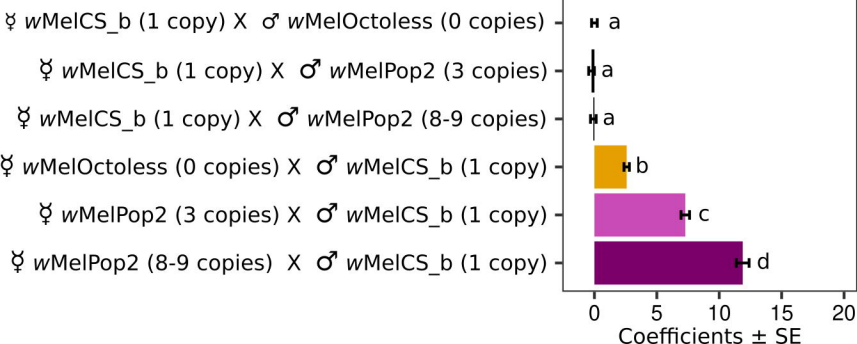

**A**

Life-shortening (18°C) vs. *Wolbachia* titer at the day of eclosion

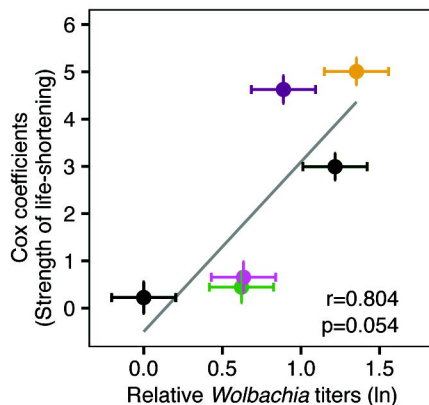**B**

Life-shortening (25°C) vs. *Wolbachia* titer at the day of eclosion

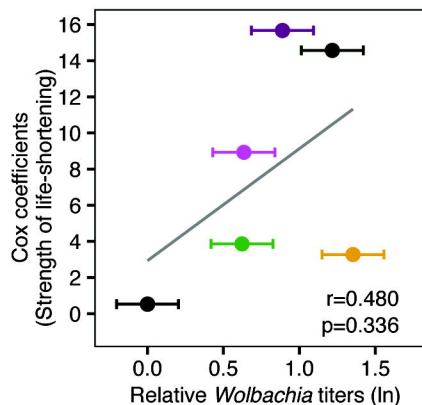**C**

Life-shortening (29°C) vs. *Wolbachia* titer at the day of eclosion

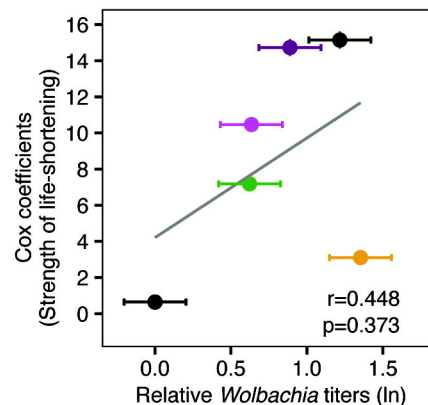**D**

Anti-viral protection vs. doubling time  
18°C

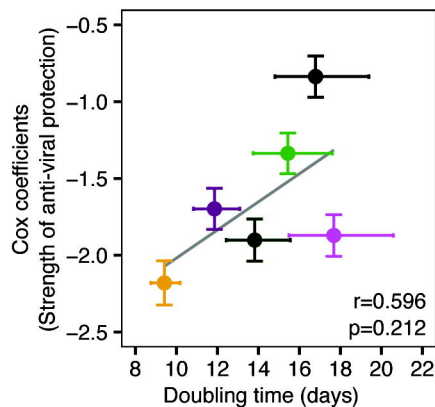**E**

Anti-viral protection vs. doubling time  
25°C

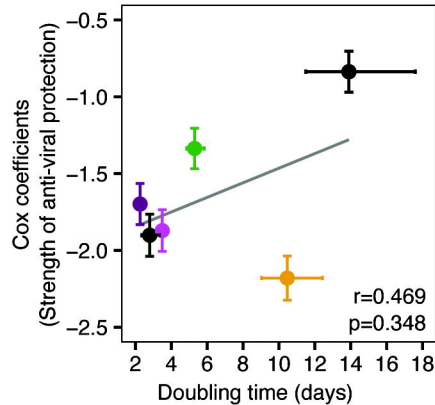

**A** Percentage of flies alive after DCV infection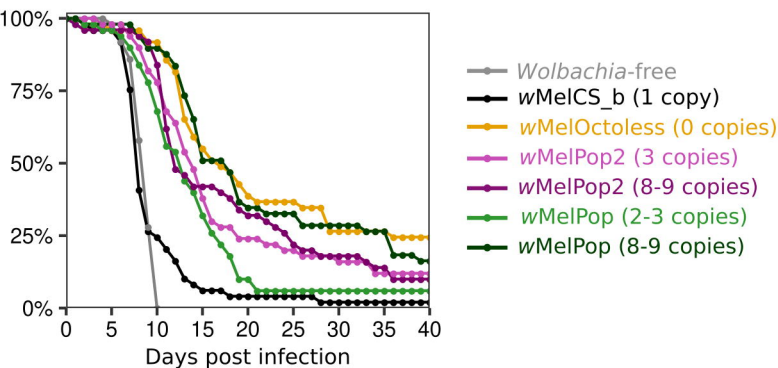**B**

## Percentage of flies alive after buffer pricking

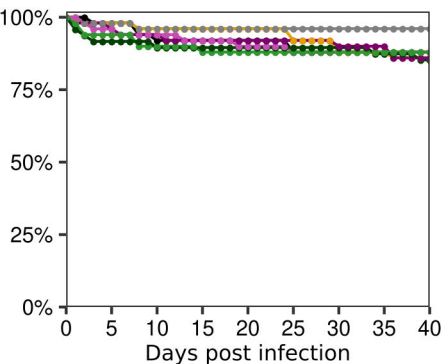**C**

## Percentage of flies alive after buffer pricking

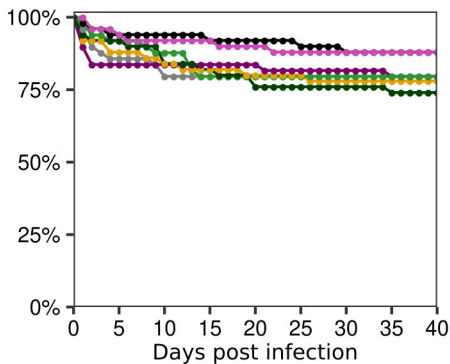**D**

## Coefficients Cox mixed model of buffer pricked flies

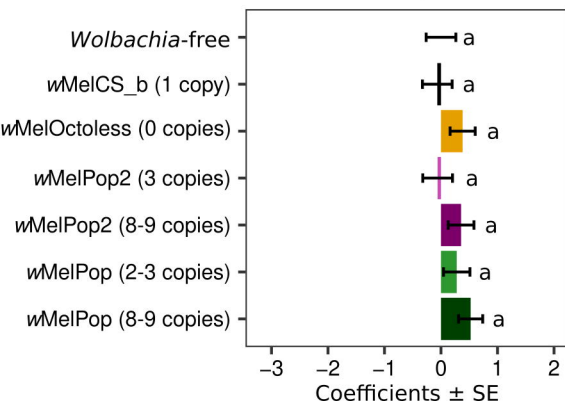

Source: https://www.biorxiv.org/content/10.1101/2020.09.08.288217v2.full.pdf
